# Supplementary material for: Distinguishing between old and modern permafrost sources with compound-specific δ 2 H analysis
Source: Copernicus journal article supplement (doi:10.5194/tc-2017-17), 2017-02-21
Supplement: Supplementary file [file tc-2017-17-AC4-supplement.pdf]

1 **Distinguishing between old and modern permafrost sources in the Northeast**  
2 **Siberian land-shelf system with compound-specific  $\delta^2\text{H}$  analysis**

3  
4 Jorien E. Vonk<sup>1</sup>, Tommaso Tesi<sup>2,3</sup>, Lisa Bröder<sup>2,4</sup>, Henry Holmstrand<sup>2,4</sup>, Gustaf  
5 Hugelius<sup>4,5</sup>, August Andersson<sup>2,4</sup>, Oleg Dudarev<sup>6,7</sup>, Igor Semiletov<sup>6,7,8</sup>, Örjan  
6 Gustafsson<sup>2,4</sup>

7  
8 <sup>1</sup> Department of Earth Sciences, VU University, The Netherlands

9 <sup>2</sup> Department of Environmental Science and Analytical Chemistry, Stockholm  
10 University, Sweden

11 <sup>3</sup> ISMAR Institute of Marine Sciences, Bologna, Italy

12 <sup>4</sup> Bolin Centre for Climate Research, Stockholm University, Sweden

13 <sup>5</sup> Department of Physical Geography, Stockholm University, Sweden

14 <sup>6</sup> Pacific Oceanological Institute FEBRAS, Vladivostok, Russia

15 <sup>7</sup> Tomsk Polytechnic University, Tomsk, Russia

16 <sup>8</sup> University of Alaska Fairbanks, Fairbanks, USA

17  
18 Correspondence to: Jorien Vonk (j.e.vonk@vu.nl)

19  
20  
21 **Keywords:** deuterium isotopes, yedoma, ice complex deposit, n-alkanoic acids, n-  
22 alkanes, organic matter, stable carbon isotopes, radiocarbon, Siberian Arctic,  
23 sediments, permafrost thaw

24  
25 **Abstract**

26 Pleistocene ice complex permafrost deposits contain roughly a quarter of the organic  
27 carbon (OC) stored in permafrost terrain. When permafrost thaws, its OC is  
28 remobilized into the (aquatic) environment where it is available for degradation,  
29 transport or burial. Aquatic or coastal environments contain sedimentary reservoirs  
30 that can serve as archives of past climatic change. As permafrost thaw is increasing  
31 throughout the Arctic, these reservoirs are important locations to assess the fate of  
32 remobilized permafrost OC.

33 We here present compound-specific deuterium ( $\delta^2\text{H}$ ) analysis on leaf waxes as a tool  
34 to distinguish between OC released from thawing Pleistocene permafrost (Ice  
35 Complex Deposits; ICD) and from thawing Holocene permafrost (from near-surface  
36 soils). Bulk geochemistry (%OC,  $\delta^{13}\text{C}$ , %total nitrogen; TN) was analyzed as well as  
37 the concentrations and  $\delta^2\text{H}$  signatures of long-chain *n*-alkanes ( $\text{C}_{21}$  to  $\text{C}_{33}$ ) and  
38 mid/long-chain *n*-alkanoic acids ( $\text{C}_{16}$  to  $\text{C}_{30}$ ) extracted from both ICD-PF samples  
39 ( $n=9$ ) and modern vegetation/O-horizon (Topsoil-PF) samples ( $n=9$ ) from across the  
40 northeast Siberian Arctic.

41 Results show that these Topsoil-PF samples have higher %OC, higher OC/TN values,  
42 and more depleted  $\delta^{13}\text{C}$ -OC values than ICD-PF samples, suggesting that these former  
43 samples trace a fresher soil and/or vegetation source. Whereas the two investigated  
44 sources differ on the bulk geochemical level, they are, however, virtually  
45 indistinguishable when using leaf wax concentrations and ratios.

**Deleted:** Median concentrations of high-molecular weight *n*-alkanes (sum of  $\text{C}_{25}$ - $\text{C}_{27}$ - $\text{C}_{29}$ - $\text{C}_{31}$ ) were  $210 \pm 350$   $\mu\text{g/gOC}$  (median $\pm$ IQR) for Topsoil-PF and  $250 \pm 81$   $\mu\text{g/gOC}$  for ICD-PF samples. Long-chain *n*-alkanoic acids (sum of  $\text{C}_{22}$ - $\text{C}_{24}$ - $\text{C}_{26}$ - $\text{C}_{28}$ ) were more abundant than long-chain *n*-alkanes, both in Topsoil-PF samples ( $4700 \pm 3400$   $\mu\text{g/gOC}$ ) and in ICD samples ( $6630 \pm 3500$   $\mu\text{g/gOC}$ ).

53 However, on the molecular-isotope level, leaf wax biomarker  $\delta^2\text{H}$  values are  
54 statistically different between Topsoil-PF and ICD-PF. For example, the mean  $\delta^2\text{H}$   
55 value of  $\text{C}_{29}$  *n*-alkane was  $-246 \pm 13\text{‰}$  (mean  $\pm$  stdev) for Topsoil-PF and  $-280 \pm 12\text{‰}$   
56 for ICD-PF. With a dynamic isotopic range (difference between two sources) of 34 to  
57 50‰, the isotopic fingerprints of individual, abundant, biomarker molecules from  
58 leaf waxes can thus serve as end-members to distinguish between these two sources.  
59 We tested this molecular  $\delta^2\text{H}$  tracer along with another source-distinguishing  
60 approach, dual-carbon ( $\delta^{13}\text{C}-\Delta^{14}\text{C}$ ) isotope composition of bulk OC, for a surface  
61 sediment transect in the Laptev Sea. Results show that general offshore patterns  
62 along the shelf-slope transect are similar, but the source apportionment between the  
63 approaches vary, which may highlight the advantages of either. This study indicates  
64 that the application of  $\delta^2\text{H}$  leaf wax values has potential to serve as a complementary  
65 quantitative measure of the source and differential fate of OC thawed out from  
66 different permafrost compartments.  
67

Deleted: T

Deleted: , whereas the  $\text{C}_{31}$  *n*-alkane was  $-247 \pm 23\text{‰}$  for Topsoil-PF and  $-297 \pm 15\text{‰}$  for ICD-PF. The  $\text{C}_{28}$  *n*-alkanoic acid  $\delta^2\text{H}$  value was  $-220 \pm 15\text{‰}$  for Topsoil-PF and  $-267 \pm 16\text{‰}$  for ICD-PF.

Deleted: The  $\delta^2\text{H}$  molecular approach has the advantage that it circumvents uncertainties related to a marine end-member, yet the  $\delta^{13}\text{C}-\Delta^{14}\text{C}$  approach has the advantage that it represents the bulk OC fraction thereby avoiding issues related to the molecular-bulk upscaling challenge.

78 **1 Introduction**

79 Climate warming is causing permafrost soils to thaw, exposing its organic matter  
80 (OM) to decomposition (e.g., Schuur et al., 2015; Zimov et al., 1993; Semiletov et al.,  
81 2012). Thaw will increase the hydrological connectivity of landscapes and will cause  
82 release of OM into the aquatic environment (Walvoord et al., 2012; Vonk et al., 2015;  
83 Anderson et al., 2011). Here, the OM can continue to decompose, generating  
84 greenhouse gases (e.g., Semiletov et al., 1996a,b; Anderson et al., 2009; Shakhova et  
85 al., 2015), or be destined for burial in inland and coastal sediments. These  
86 sedimentary archives serve as long- and short-term reservoirs that attenuate  
87 greenhouse gas emissions from thawing permafrost (Vonk and Gustafsson, 2013;  
88 Semiletov et al., 2011).

Deleted: to

89  
90 The release of OM from thawing permafrost into aquatic sediments varies over time  
91 and space. A recent study showed that at the end of the last glacial, the surface active  
92 layer of terrestrial permafrost released about 4.5 Tg organic carbon (OC) per year  
93 from just the Lena watershed onto the nearby shelf, whereas current annual OC  
94 release is estimated to be only about a tenth of this (Tesi et al., 2016). In addition to  
95 active layer material, OM from deeper and older permafrost sources can also thaw  
96 and be released into the environment (Shakhova et al., 2007, 2014). This process  
97 currently dominates the delivery of terrestrial material onto the East Siberian Arctic  
98 shelf (Vonk et al., 2012; Semiletov et al., 1999) and is expected to increase due to  
99 accelerating coastal erosion rates (Günther et al., 2013).

100  
101 Different permafrost OC stocks exhibit variable vulnerabilities to thaw remobilization  
102 (Schuur et al., 2015). In addition to a subsea permafrost OC stock, soils and sediments  
103 of the terrestrial northern permafrost zone store about 1300±200 Pg OC, with  
104 separate upscaling approaches applied for soil stocks (0-3m depth), deltaic sediments  
105 (full depth) and Yedoma sediments (full depth) (Hugelius et al., 2014). Yedoma  
106 sediments, a.k.a. Ice Complex Deposits (ICD) are polygenetic, ice-rich Pleistocene-  
107 aged deposits that are present in the unglaciated parts of Siberia and Alaska  
108 (Schirrmeister et al., 2011). These deposits contain roughly a quarter of the OC stored  
109 in permafrost terrain, but estimates vary from ca. 200-400 Pg C (Strauss et al., 2013;  
110 Schuur et al., 2015). The presence of massive ice wedges in ICD causes landscapes to  
111 collapse upon thaw, exposing deeper stocks of OC. This type of relatively abrupt thaw  
112 is increasing in many parts of the arctic landscape (Schuur et al., 2015). At the same  
113 time, deepening of the active layer causes gradual thaw that occurs across entire  
114 landscapes (Shiklomanov et al., 2013).

115  
116 With a tool to detect and monitor different types of permafrost OM in coastal  
117 environments, one could assess (historical and spatial) variability in permafrost  
118 source input, degradation and thaw, as well as the relative degradation of different  
119 permafrost types. For example, the relative release of OC from ICD versus topsoil  
120 permafrost has earlier been distinguished and quantified through the use of dual-  
121 carbon isotopes ( $\delta^{13}\text{C}$  and  $\Delta^{14}\text{C}$ ) on bulk OC in the shelf environment of the Laptev  
122 and East Siberian Sea. It was shown that topsoil permafrost OC dominates in  
123 suspended particulate matter (Karlsson et al., 2011; 2016; Vonk et al., 2012) and ICD

125 permafrost OC dominates in the surface sediments (Vonk et al., 2012; Semiletov et al.,  
126 2011; 2012). Vonk et al. (2014) further showed that topsoil OC is actively degraded  
127 during horizontal transport whereas ICD permafrost OC rapidly settles. Winterfeld et  
128 al. (2015) showed, using dual-carbon isotopes on riverine material, that suspended  
129 particulate OC in the Lena Delta mostly consists of Holocene material instead of  
130 material from ICD permafrost.

131  
132 This  $\delta^{13}\text{C}-\Delta^{14}\text{C}$  dual-carbon isotope approach carries the strong advantage that it  
133 operates on the bulk OC level, thereby circumventing the "molecular-bulk upscaling  
134 challenge". This challenge relates to issues associated with upscaling from the  
135 molecular isotope level to the bulk level. These issues relate to the relative  
136 concentration (*n*-alkanes and *n*-alkanoic acids represent only a fraction of the total  
137 OC) but also to processes such as selective degradation, differences in physical  
138 association, or dispersion differences. However, the  $\delta^{13}\text{C}-\Delta^{14}\text{C}$  approach also has  
139 drawbacks, such as a weak distinction between the  $\delta^{13}\text{C}$  end-member values of  
140 Topsoil-PF versus ICD-PF. Also, the marine  $\delta^{13}\text{C}$  end member values in coastal Arctic  
141 shelf waters are uncertain and may be more depleted than at mid-latitudes due to  
142 uptake of relatively depleted dissolved  $\text{CO}_2$  values caused by cold polar water  
143 (Meyers, 1997; Tesi et al. *this special issue*) or degradation of terrestrial matter  
144 (Anderson et al., 2009; 2011; Semiletov et al., 2013; 2016), generating a potential  
145 overlap between marine and topsoil  $\delta^{13}\text{C}$  end-members.

146  
147 Here we propose a complementary tool to trace permafrost OC release into the  
148 coastal environment based on molecular  $\delta^2\text{H}$  analysis on leaf waxes. We will evaluate  
149 the performance of this tool using additional geochemical data as well as the bulk  
150  $\delta^{13}\text{C}-\Delta^{14}\text{C}$  mixing approach. Isotopes in water molecules ( $\delta^2\text{H}$  or  $\delta^{18}\text{O}$ ) in glacial ice  
151 cores as well as in massive ground ice in the northern hemisphere have been used for  
152 reconstructing palaeotemperatures (e.g., Kotler and Burn, 2000; Johnson et al., 2001;  
153 Opel et al., 2011; Meyer et al., 2015; Wetterich et al., 2016) as the isotopic value of  
154 local precipitation is a function of local climate (Craig, 1961; Sachse et al., 2004; Smith  
155 and Freeman, 2006). Higher plants use water as their primary source of hydrogen  
156 during photosynthesis (Sternberg, 1988). The  $\delta^2\text{H}$  isotope values of leaf wax *n*-  
157 alkanic acids or *n*-alkanes are therefore reflecting the  $\delta^2\text{H}$  isotopic value of local  
158 precipitation (e.g., Sachse et al., 2004; Sessions et al., 1999), after correction for the  
159 net fractionation during biosynthesis, and evapotranspiration (Leaney et al., 1985).  
160 Global precipitation values can vary immensely (Dansgaard, 1964), with values up to  
161 +50‰ in Eastern Africa, but approaching -200‰ near the North Pole (www.iaea.org)  
162 or even below -400‰ in Antarctica (i.e. SLAP2 standard, Standard Light Antarctic  
163 Precipitation, is -427.5‰). Additionally, the fractionation between source water and  
164 plant wax molecules varies both in time and space, and can be up to -170‰ (Smith  
165 and Freeman, 2006; Sachse et al., 2004; Polissar and Freeman, 2010) but appears  
166 relatively small at higher latitudes (between -59 and -96‰; Shanahan et al., 2013;  
167 Wilkie et al., 2013; Porter et al., 2016). Differences in  $\delta^2\text{H}$  signatures of leaf wax  
168 molecules from terrestrial regions with different (past) climates could therefore  
169 potentially be applied to derive the relative proportion of different types of thawing

- Deleted: proxies
- Formatted: Font:Italic
- Formatted: Font:Italic
- Deleted: that relate to upscaling from the molecular to the bulk level (e.g.
- Deleted: )

- Formatted: Font:12 pt
- Deleted: by as much as 200‰
- Formatted: Font:12 pt
- Deleted: around
- Deleted: 0
- Deleted: the tropics

178 permafrost in nearby coastal settings. Despite the plant fractionation associated with  
179 kinetics and plant physiology (Sachse et al., 2012), we hypothesize that  $\delta^2\text{H}$   
180 signatures of leaf wax *n*-alkanoic acids and *n*-alkanes are more depleted in OC from  
181 permafrost deposits formed during the colder Pleistocene (generally correlating with  
182  $^2\text{H}$ -depleted precipitation), compared to more enriched values in OC from active layer  
183 or surface permafrost formed during the warmer Holocene.

Deleted: We hypothesize

Deleted: and drier

Formatted: Superscript

184  
185 This study investigates a source-specific  $\delta^2\text{H}$  signature for both ICD permafrost and  
186 recent, surface soil permafrost in Northeast Siberia. Furthermore, we explore the  
187 possibilities of using these isotopic end-member values in regional source-  
188 apportionment calculations that aim to quantify the relative contribution of different  
189 sources of permafrost OC. As permafrost thaw progresses, particularly in ice-rich  
190 permafrost such as ICD, it is increasingly important to trace the fate of remobilized  
191 and decomposing OC in the Arctic environment. Our proposed tool may be used to  
192 trace these temporal and spatial differences in OC release from permafrost thaw, as  
193 well as the extent of burial of OC in sedimentary reservoirs.

## 194 195 **2 Methods**

### 196 197 **2.1 Sampling**

198 A total of 18 samples were collected throughout the Siberian Arctic. Recent surface  
199 soils ( $n=7$ ) and vegetation ( $n=2$ ) samples were analyzed and (from here on) referred  
200 to as the "topsoil" permafrost (Topsoil-PF) sample set, whereas ICD-PF samples were  
201 obtained from ICD soil profiles ( $n=7$ ) and suspended particulates from ICD  
202 formations ( $n=2$ ) (Fig. 1 and Table 1). Eight offshore sediments along a shelf-slope-  
203 continental rise transect in the Laptev Sea were collected in 2014, further marine  
204 sampling details can be found in Bröder et al. (2016b).

205  
206 The Topsoil-PF samples represent O and A soil genetic horizons in sites with active  
207 soil formation. The sites were chosen to represent typical soil and vegetation types  
208 in the investigated permafrost landscapes, including both taiga and tundra sites.  
209 Samples were collected by depth or soil horizon increments from open soil pits using  
210 fixed volume sampling procedures.

211  
212 The ICD-PF samples were collected from vertical exposures that were excavated to  
213 expose intact permafrost. Fixed-volume samples were collected by coring  
214 horizontally into the frozen sediments to extract ICD-PF samples from consecutive  
215 depths.

216  
217 For more details about sampling sites, including location, vegetation and soil types  
218 see table 1 (terminology following the U.S.D.A. Soil Taxonomy; Soil Survey Staff,  
219 2014). Sampling was done in late summer near the time of maximum annual active  
220 layer depth, in July 2010 (ICD-8 and ICD-9; Vonk et al. (2013)) and August 2011  
221 (Palmtag et al., 2015) for the Kolyma River region, in August 2012 for the lower Lena  
222 River and Indigirka River (Siewert et al., 2015; Weiss et al., 2015) and in August 2013

Deleted: CH DY-3A and 4A

226 for the upper Lena River (Siewert et al., 2016). For more detailed descriptions of  
227 sample collection we refer to these references. The vegetation samples **TS-8G (grass)**  
228 and **TS-9G (grass)** were obtained from the tundra near Medvezhka River and a birch  
229 forest near Y4 stream, respectively, in July 2012.

Deleted: CH

Deleted: Medv

Deleted: CH Y4

230  
231 Samples **ICD-8** and **ICD-9** were obtained in July 2010 at the Duvannyi Yar ICD  
232 exposure along the Kolyma River (Vonk et al., 2013). The particulate sediment  
233 samples were taken from thaw streams that were freshly formed from thawing ICD  
234 (transport time from thaw to sampling estimated to be less than 1h).

Deleted: CH DY-3A

Deleted: 4A

## 235 2.2 Analytical methods

236 Freeze-dried samples were extracted using an ASE 200 accelerated solvent extractor  
237 (Dionex Corporation, USA) using DCM/MeOH (9:1 v/v) at 80°C (5x10<sup>6</sup> Pa)  
238 (Wiesenberg et al., 2004). After the extraction, solvent-rinsed activated copper and  
239 anhydrous sodium sulfate were added to the extracts to remove sulfur and excess  
240 water, respectively. After 24 h, extracts were filtered on pre-combusted glass wool  
241 and concentrated with the rotary evaporator. Extracts were transferred into glass  
242 tubes, evaporated to complete dryness and re-dissolved in 500 µl of DCM. Lipid  
243 fractionation was performed via column chromatography using amino-propyl Bond  
244 Elut (500 mg/3 ml) to retain the acid fraction and Al<sub>2</sub>O<sub>3</sub> to separate the hydrocarbon  
245 and polar fractions (Vonk et al., 2010).

246  
247  
248 Prior to the analyses, saturated *n*-alkanes (hydrocarbon fraction) were further  
249 purified using 10% AgNO<sub>3</sub> coated silica gel to retain the unsaturated fraction. The acid  
250 fraction was methylated using a mixture of HCl, MilliQ water and methanol at 80°C  
251 overnight to obtain the fatty acid methyl ester (FAME) fraction. Methylated acids  
252 were extracted with hexane and further purified using 10% AgNO<sub>3</sub> coated silica gel.  
253 The hydrocarbon and FAME fractions were quantified via gas chromatography mass  
254 spectrometry (GC-MS) in full scan mode (50-650 m/z) using the response factors of  
255 commercially available standards (Sigma-Aldrich). The GC was equipped with a 30  
256 m×250 µm DB5-ms (0.25 µm thick film) capillary GC column. Initial GC oven  
257 temperature was set at 60°C followed by a 10°C min<sup>-1</sup> ramp until a final temperature  
258 of 310°C (hold time 10 min).

259  
260 The hydrogen-isotopic composition of hydrocarbon and FAME fractions was  
261 measured with continuous-flow GC - isotope ratio - MS. Purified extracts were  
262 concentrated and injected (1-2 µl) into a Thermo Trace Ultra GC equipped with a  
263 30m×250 µm HP5 (0.25 µm thick film) capillary GC column. Oven conditions were  
264 similar to the setting used for the quantification. The conversion of organic  
265 biomarkers to elemental hydrogen was accomplished by high-temperature  
266 conversion (HTC) at 1420°C (Thermo GC Isolink). After the HTC, H<sub>2</sub> was introduced  
267 into the isotope ratio MS (Thermo Scientific™ Delta V™IRMS) for compound-specific  
268 determination of δ<sup>2</sup>H values via a Thermo ConFlo IV. Following a linearity test, we only  
269 used peaks with amplitude (mass 2) between 1500 and 8000 mV for the evaluation.  
270 The δ<sup>2</sup>H values were calibrated against saturated HMW *n*-alkanes using the reference

276 substance mix A4 (Biogeochemical Laboratories, Indiana University). The  $H_3^+$  factor  
277 ([Sessions et al., 2001](#)) was determined every day and stayed constant ( $<3\text{‰}/V$ )  
278 throughout [our analyses period](#). Each purified extract was injected three times.  
279 FAMES were further corrected to account for the methylation agent by comparing the  
280 hydrogen abundance of lauric acid ( $C_{12}$ -FA; i.e. 12 carbon atoms) as acid and  
281 corresponding methyl ester. The average methylation [correction](#) for lauric acid was  
282  $23.97 \pm 3.9\text{‰}$  ( $n=4$ ). This [correction](#) was, normalized to chain length (i.e. increasing  
283 chain lengths result in lower corrections), applied to all the FAMES.  $\delta^2H$  values of  $n$ -  
284 alkanes and FAMES are reported as mean, standard deviation and weighted average,  
285

Formatted: Subscript

Formatted: Superscript

Deleted: the evaluation

Deleted: effect

Deleted: factor

Deleted: (Table 5)

286 [Details of the analytical methods for extraction, work-up, and purification of the eight](#)  
287 [offshore sediment samples for biomarker analysis that are included in our source-](#)  
288 [apportionment comparison \(section 4.3\) can be found in Bröder et al. \(2016b\). The](#)  
289  [\$\delta^2H\$  analysis on the shelf sediments was performed in parallel with the ICD-PF and](#)  
290 [Topsoil-PF samples, according to the method described above.](#)  
291

Formatted: Font:Symbol

Formatted: Superscript

### 292 2.3 Source apportionment

293 The compound-specific  $\delta^2H$  signatures in this study were used to differentiate  
294 between the two major sources (end-members), Topsoil-PF and ICD-PF, using an  
295 isotopic mass-balance model. We used a Markov chain Monte Carlo (MCMC) approach  
296 to account for the end-member variability (Andersson et al., 2015; Bosch et al., 2015).  
297 The end-members were represented by normal distributions, with mean and  
298 standard deviations obtained [from our analysis \( \$\delta^2H\$  on TS and ICD samples\) and](#)  
299 [from literature \( \$\delta^{13}C\$  and  \$\Delta^{14}C\$  on end-members\)](#). For each Laptev Sea station, the  
300 isotope signatures from three different terrestrial molecular markers (long-chain  $n$ -  
301 alkanes  $C_{27}$ ,  $C_{29}$  and  $C_{31}$ ) were used jointly to improve source apportionment  
302 precision. The  $\delta^2H$  signatures for the two end-members were based on our Topsoil-  
303 PF and ICD-PF samples,  
304

Formatted: Font:12 pt

Formatted: Font:Symbol, 12 pt

Formatted: Font:12 pt, Superscript

Formatted: Font:12 pt

Formatted: Font:Symbol, 12 pt

Formatted: Font:12 pt, Superscript

Formatted: Font:12 pt

Deleted: from the literature values

Formatted: Font:Symbol, 12 pt

Formatted: Font:12 pt, Superscript

Formatted: Font:12 pt

Deleted: (see Table 5 for mean source values)

305 The compound-specific  $\delta^2H$ -based source apportionment was compared to  
306  $\Delta^{14}C/\delta^{13}C$ -based analysis of bulk OC using analogous MCMC techniques (e.g., Vonk et  
307 al., 2012). The  $\Delta^{14}C/\delta^{13}C$ -approach allows estimation of the relative contribution of a  
308 third source, marine, which does not affect the presently investigated (terrestrial)  
309 compounds. Accounting for the marine component to OC allows direct comparison of  
310 the Holocene and Pleistocene contributions. All MCMC calculations were made using  
311 Matlab scripts (ver. 2014b) using 200,000 iterations, a burn-in phase (initial search  
312 period) of 10,000 and a data thinning of 10.  
313

314 The spatial extent of ICD in the Lena River Basin was calculated by overlaying  
315 the extent of the drainage basin (from WRIBASIN: Watersheds of the World  
316 published by the World Resources Institute, [www.wri.org/publication/watersheds-](http://www.wri.org/publication/watersheds-world)  
317 [world](http://www.wri.org/publication/watersheds-world)) with the extent of the Yedoma Region (digitized from Romanovsky, 1993) in  
318 an equal area map projection. It was assumed that 30% of the Yedoma Region consists  
319 of intact ICD (following Strauss et al., 2013).  
320

### 3 Results

#### 3.1 Bulk geochemistry

The investigated Topsoil-PF and ICD-PF samples are, on a bulk geochemical level, very different. Mean organic carbon contents (as %OC) and total nitrogen content (as %TN) are  $25 \pm 12$  and  $1.1 \pm 0.67$  for Topsoil-PF samples, and  $1.6 \pm 0.31$  and  $0.17 \pm 0.058$  for ICD-PF samples, respectively (Table 1). This gives TOC/TN ratios of  $25 \pm 8.0$  for Topsoil-PF samples and  $10 \pm 2.6$  for ICD-PF samples. Stable carbon isotopic values of Topsoil-PF and ICD-PF samples are  $-27.8 \pm 1.3\text{‰}$  and  $-25.7 \pm 0.75\text{‰}$ , respectively (Table 1). Radiocarbon ages were unfortunately only available for a few ICD samples, and ranged between 17 and 28 <sup>14</sup>C ka (Table 1).

Formatted: Superscript

#### 3.2 Molecular geochemical composition

Long-chain *n*-alkanes and *n*-alkanoic acids are abundant in epicuticular waxes and therefore indicative for a source of higher plants (Eglinton and Hamilton, 1967). Concentrations of individual long-chain *n*-alkanes in Topsoil-PF samples ranged from 1 to 340  $\mu\text{g/gOC}$  ( $\text{C}_{21}$ - $\text{C}_{33}$ ; Table 2) with an average chain length of  $28 \pm 1.6$ . The sum of high-molecular weight (HMW) *n*-alkanes ( $>\text{C}_{21}$ ) for Topsoil-PF samples was  $418^{612}_{280}$   $\mu\text{g/gOC}$  (median with interquartile range) and the most abundant *n*-alkanes added up to  $214^{494}_{148}$   $\mu\text{g/gOC}$  (sum of  $\text{C}_{25}$ - $\text{C}_{27}$ - $\text{C}_{29}$ - $\text{C}_{31}$ ) (Table 4, Fig. 2a). For ICD-PF samples, the individual concentrations of long-chain *n*-alkanes were between 4 and 160  $\mu\text{g/gOC}$ , and the average chain length  $27 \pm 0.7$  (Table 2). The sum of high-molecular weight *n*-alkanes, and most abundant *n*-alkanes were  $698^{806}_{630}$   $\mu\text{g/gOC}$  and  $347^{405}_{323}$   $\mu\text{g/gOC}$ , respectively (Table 4, Fig. 2a). The carbon preference index (CPI), a molecular ratio indicative for degradation status with values  $>5$  typical for fresher terrestrial material and values approaching 1 typical for more degraded samples (Hedges and Prahl, 1993), showed values for Topsoil-PF samples of  $7.3 \pm 3.6$  (average  $\pm$  standard deviation) and ICD-PF samples of  $3.6 \pm 0.8$  (CPI  $\text{C}_{23}$ - $\text{C}_{31}$ ; Table 4, Fig. 2c). The  $\text{C}_{25}/(\text{C}_{25}+\text{C}_{29})$  ratio, indicative for the input of peat moss (*Sphagnum sp.*) material (Vonk and Gustafsson, 2009; *Sphagnum* values 0.72, higher plants 0.07; Nott et al., 2000) was  $0.33 \pm 0.22$  (average  $\pm$  standard deviation) and  $0.34 \pm 0.05$  for Topsoil-PF and ICD-PF samples, respectively (Table 4). Another commonly used *Sphagnum* proxy (Bush and McInerney, 2013),  $\text{C}_{23}/(\text{C}_{23}+\text{C}_{29})$ , resulted in a sharper contrast between ICD-PF and Topsoil-PF samples ( $0.39 \pm 0.13$  and  $0.25 \pm 0.23$ , respectively; Fig. 2e and Table 4).

Deleted: 420  $\pm$  330

Deleted:  $\pm$ IQR;

Deleted: 210  $\pm$  350

Deleted: 700  $\pm$  180

Deleted: 350  $\pm$  81

Long-chain *n*-alkanoic acids ( $\text{C}_{22}$  and above) were abundant in concentrations between 0.122 and 2670  $\mu\text{g/gOC}$  for individual homologues in topsoils, with the sum of HMW *n*-alkanoic acids ( $>\text{C}_{22}$ ) being  $6397^{7454}_{3167}$   $\mu\text{g/gOC}$  (median and JQR) and the most abundant *n*-alkanoic acids (sum of  $\text{C}_{22}$ - $\text{C}_{24}$ - $\text{C}_{26}$ - $\text{C}_{28}$ ) adding up to  $4700^{6092}_{2670}$   $\mu\text{g/gOC}$  (Table 3, 4 and Fig. 2b). ICD-PF samples contained individual long-chain *n*-alkanoic acids in 2.17 and 18700  $\mu\text{g/gOC}$  (Table 2), a sum of HMW *n*-alkanoic acids of  $8290^{11430}_{6290}$   $\mu\text{g/gOC}$ , and the sum of most abundant, even *n*-alkanoic acids of  $6630^{8790}_{5285}$   $\mu\text{g/gOC}$  (Table 4). Topsoil-PF and ICD-PF samples had average chain lengths of  $24.1 \pm 1.1$  and  $24.3 \pm 0.59$ , and CPI ( $\text{C}_{22}$ - $\text{C}_{28}$ ) values of  $5.9 \pm 2.7$  (average  $\pm$  standard

Formatted: Font:Italic

Formatted: Subscript

Formatted: Subscript

Formatted: Subscript

Deleted: .

Deleted: 6400  $\pm$  4300

Deleted:  $\pm$

Deleted: 4700  $\pm$  3400

Deleted: 2

Deleted: 3

Deleted: 8300  $\pm$  5100

Deleted: 6600  $\pm$  3500



385 deviation) and  $5.0 \pm 1.6$ , respectively (Table 4). Shorter-chain *n*-alkanoic acids C<sub>16</sub> and  
386 C<sub>18</sub> are produced in basically all types of life in soils or aquatic environments, and are  
387 not specific for higher plants. Topsoil-PF contained C<sub>16</sub> and C<sub>18</sub> homologues in  
388 concentrations between 220 and 4600  $\mu\text{g/gOC}$ , and ICD-PF samples between 200 and  
389 10400  $\mu\text{g/gOC}$  (Table 3).

390

391 Degradation of organic matter involves the loss of functional groups, e.g. the loss of  
392 carboxylic acids (Meyers and Ishiwatari, 1993). A high ratio of HMW *n*-alkanoic acids  
393 over HMW *n*-alkanes in a sample therefore implies a relatively fresh, less degraded,  
394 status (i.e. relatively more functional groups present). For Topsoil-PF samples, the  
395 HMW *n*-alkanoic acid/HMW *n*-alkane ratio varied between 5.6 and 25 with an  
396 average value of  $13 \pm 7.6$ , whereas ICD-PF samples varied between 7.6 and 140 with  
397 an average value of  $29 \pm 43$  (Table 4, Fig. 2f).

398

### 399 3.3 Molecular isotopic composition

400 We measured  $\delta^2\text{H}$  values in long-chain *n*-alkanes and *n*-alkanoic acids between -119  
401 and -313‰ (Fig. 3, Table 5). Mean values for HMW *n*-alkanes (C<sub>25</sub>-C<sub>27</sub>-C<sub>29</sub>-C<sub>31</sub>) were  
402 between -201 and -247‰ for Topsoil-PF samples and between -221 and -297‰ for  
403 ICD-PF samples, with consistently lower  $\delta^2\text{H}$  for longer chain lengths. For HMW *n*-  
404 alkanolic acids (C<sub>22</sub>-C<sub>24</sub>-C<sub>26</sub>-C<sub>28</sub>) mean  $\delta^2\text{H}$  values were between -203 and -236‰ for  
405 Topsoil-PF samples and between -261 and -278‰ for ICD-PF samples (Table 5). The  
406 decrease in  $\delta^2\text{H}$  values with increasing chain length is less distinct for *n*-alkanoic acids  
407 but one can observe a decrease of around 25-30‰ from C<sub>22</sub> to C<sub>26</sub> (Fig. 3). For ICD-  
408 PF samples, the isotopic depletion for the average of the three most abundant *n*-  
409 alkanes is comparable to the average for *n*-alkanoic acids, whereas in Topsoil-PF  
410 samples, the isotopic depletion for the three most abundant *n*-alkanes is a bit larger  
411 than for *n*-alkanoic acids (Fig. 4).

412

## 413 4 Discussion

414

### 415 4.1 Using bulk geochemistry and molecular proxies

416 Bulk geochemical and isotopic analysis, as well as analysis of molecular proxies  
417 remained inconclusive in distinguishing between the two investigated sources in this  
418 study. Topsoil-PF samples have a higher organic content, higher TOC/TN values  
419 (representing fresh, higher plant material; Meyers, 1994) and more depleted  $\delta^{13}\text{C}$   
420 values (indicative for terrestrial C3 plants; Meyers, 1997) than ICD-PF samples,  
421 suggesting that these samples indeed trace a fresh soil and/or vegetation source  
422 (Table 1). The  $\delta^{13}\text{C}$  values of a larger ICD-PF and Topsoil-PF dataset have earlier been  
423 summarized (Vonk et al., 2012 and references therein; Schirrmeister et al., 2011)  
424 giving values of  $-26.3 \pm 0.67\text{‰}$  (n=374) and  $-28.2 \pm 2.0\text{‰}$  (n=30), respectively. Our  
425 values (Table 1) are in a similar range. Despite the differences between these two  
426 sources in their bulk geochemistry, it is hard to use these parameters for source  
427 distinction as their variability is fairly high, and their behavior in the environment is  
428 not conservative, but e.g. affected by degradation processes. On a molecular  
429 geochemical level the two investigated sources are virtually indistinguishable as

Deleted: it seems that

Deleted: h

432 there is a considerable variation in molecular concentrations and proxy values (Fig.  
433 2). Only one of the tested parameters, the CPI  $C_{23}$ - $C_{31}$  of *n*-alkanes, showed a  
434 statistically significantly different value for the two investigated sources.  
435

#### 436 4.2 Evaluation of molecular $\delta^2H$ values as a source end-member

437 To alleviate the difficulty to distinguish between Topsoil-PF and ICD-PF with just bulk  
438 and molecular geochemical characteristics, we explore the  $\delta^2H$  values of leaf wax  
439 molecules (i.e. long chain *n*-alkanoic acids and *n*-alkanes) to differentiate between  
440 their relative source contributions. The overall mean  $\delta^2H$  of the four most abundant  
441 *n*-alkanoic acids is  $-231\pm 29\text{‰}$  and  $-271\pm 13\text{‰}$  for Topsoil-PF and ICD-PF samples,  
442 respectively. These values compare well with available literature (Fig. 5). Pautler et  
443 al. (2014) measured  $\delta^2H$  values on  $C_{29}$  *n*-alkanes in modern soils of the Yukon, Canada  
444 of  $-252\pm 9.1\text{‰}$  ( $n=4$ ) and aged soil  $\delta^2H$  values of  $-269\pm 8.6\text{‰}$  ( $n=13$ ; 24-25  $^{14}C$ -ka ago)  
445 and  $-273\pm 16.4\text{‰}$  ( $n=9$ ; for MIS 4,  $\sim 70$   $^{14}C$ -ka ago). Yang et al. (2011) also reported  
446  $C_{29}$  *n*-alkane  $\delta^2H$  values for modern vegetation from Alaska and Arctic Canada with an  
447 average value of  $-252\pm 43\text{‰}$  ( $n=8$ ). Zech et al. (2011) reported values of  $C_{29}$  *n*-alkanes  
448 collected from a permafrost exposure along the Tumara River in northeast Siberia,  
449 with an average value of  $-266\pm 7.5\text{‰}$  ( $n=23$ ) for glacial paleosoils and  $-247\pm 9.4\text{‰}$   
450 ( $n=17$ ) for interglacial paleosoils. Our values for  $C_{29}$  *n*-alkanes for Topsoil-PF ( $-$   
451  $246\pm 13\text{‰}$ ;  $n=9$ ) and ICD-PF ( $-280\pm 12\text{‰}$ ;  $n=9$ ) are in a similar range (Fig. 5). For  $C_{28}$   
452 *n*-alkanoic acids, Wilkie et al. (2013) measured  $-252\pm 8.7\text{‰}$  ( $n=6$ ) for modern  
453 vegetation in northeast Siberia, whereas Porter et al. (2016) measured  $-269\pm 2.7\text{‰}$   
454 ( $n=7$ ) for ca. 31 cal ka BP old soils in the Yukon. Compared to these studies, our values  
455 for  $C_{28}$  *n*-alkanoic acids are somewhat more enriched for Topsoil-PF with  $-220\pm 15\text{‰}$   
456 ( $n=7$ ) but roughly in the same range for ICD-PF with  $-267\pm 16\text{‰}$  ( $n=9$ ).  
457

458 The mean isotopic difference between the most abundant *n*-alkanoic acids of the two  
459 investigated sources is around  $40\text{‰}$  ( $\delta^2H$  values of  $-231\pm 29\text{‰}$  and  $-271\pm 13\text{‰}$  for  
460 Topsoil-PF and ICD-PF samples, respectively). Despite the relatively large standard  
461 deviations, the isotopic differences are statistically significant for each of the *n*-  
462 alkanoic acids individually ( $C_{22}$ ,  $C_{24}$ ,  $C_{26}$ ,  $C_{28}$ ; Fig. 3). The isotopic differences between  
463 the two sources for the mean value of the four most abundant *n*-alkanes is  $35\text{‰}$ , with  
464 a mean value of  $-229\pm 33\text{‰}$  and  $-264\pm 34\text{‰}$  for Topsoil-PF and ICD-PF samples,  
465 respectively. Here, the individual *n*-alkane isotopic signatures are statistically  
466 significantly different for  $C_{27}$ ,  $C_{29}$ ,  $C_{31}$  (Fig. 3) in Topsoil-PF and ICD-PF samples. The  
467 selection and application of individual chain length  $\delta^2H$  values as end-members, in  
468 contrast to mean chain length values, might be more appropriate for several reasons;  
469 (i) to reduce variability ( $\delta^2H$  ranges for  $C_{29}$  and  $C_{31}$  *n*-alkanes and  $C_{22}$  and  $C_{24}$  *n*-  
470 alkanoic acids are relatively low; Fig. 3), (ii) to target the most abundant species ( $C_{29}$   
471 and  $C_{31}$  *n*-alkanes are generally more abundant in soils and ICD-PF compared to  
472 shorter chain lengths; Table 2), and (iii) to make use of the largest dynamic range  
473 between source end-member values ( $C_{31}$  *n*-alkane  $\delta^2H$  values of Topsoil-PF and ICD-  
474 PF differ by  $50\text{‰}$ ). Based on these arguments, the  $C_{28}$  *n*-alkanoic acid and the  $C_{29}$  or  
475  $C_{31}$  *n*-alkanes are most appropriate to use for source-apportionment. The available

476 previous studies (Fig. 5) have also selected these chain lengths (C<sub>28</sub> *n*-alkanoic acid  
477 and C<sub>29</sub> *n*-alkanes) for proxy development.

478  
479 The use of molecular δ<sup>2</sup>H values as tracers of terrestrial material in a marine or  
480 coastal setting has the advantage that it avoids uncertainty issues related to definition  
481 of the marine end-member. On the other hand, the inherent bulk-upscaling challenge  
482 of any molecular proxy, is a disadvantage of the δ<sup>2</sup>H approach as it introduces  
483 unknowns related to the molecular-bulk upscaling effort (e.g. taking into account  
484 sorting and recalcitrance; discussed in depth in 4.3). We also want to emphasize that  
485 δ<sup>2</sup>H leaf wax values in the two studied end-member sets (Topsoil-PF vs. ICD-PF)  
486 largely depend on the climate (warm vs. cold) and continentality (near the coast vs.  
487 further inland) during plant formation, and associated differences in fractionation  
488 mechanisms. Consequently, when δ<sup>2</sup>H values in samples are used for source-  
489 apportionment, this may represent the fraction leaf wax produced in cold vs. warm  
490 conditions (as well as degree of continentality), and not necessarily the fraction  
491 Topsoil-PF vs. ICD-PF.

492  
493 Finally, we realize that the amount of soil and ICD samples analyzed in this study is  
494 limited, and want to point out that the results may change when more data are  
495 analyzed in the near future. Additionally, studies have shown that the δ<sup>2</sup>H signature  
496 of ice within ICD permafrost deposits can range from roughly -150‰ to -260‰  
497 depending on the type of ice (wedge ice vs. pore or texture ice) as well as the period  
498 of formation (different Pleistocene cold stages) (Opel et al., 2017 and references  
499 therein). The source of water (i.e. type of ice) and age of the deposit will therefore  
500 influence the *n*-alkane or *n*-alkanoic acid δ<sup>2</sup>H signal. However, regardless of the  
501 natural variability associated with the processes mentioned above, both ICD and  
502 texture-ice isotopic compositions appear to reflect long-term climate changes (Opel  
503 et al., 2017; Schwamborn et al., 2006; Dereviagin et al., 2013; Porter et al., 2016)  
504 which, likely, were also captured in the *n*-alkane or *n*-alkanoic acid δ<sup>2</sup>H signal.  
505 Unfortunately, we do not have <sup>14</sup>C-ages available for all ICD samples, so cross-  
506 referencing to published stratigraphies in the region is not possible. Coastal  
507 sediments, however, will represent a mixture of material released from different  
508 depths, outcrops, and stratigraphies within the catchment or coast. For source-  
509 apportionment applications, we reason that a growing body of leaf wax δ<sup>2</sup>H end-  
510 member data from the ICD region can overcome the variability issues highlighted  
511 above.

#### 512 513 **4.3 Comparison with <sup>13</sup>C-<sup>14</sup>C source-apportionment: a case-study**

514 Bulk OC dual-carbon isotope data provide a quantitative apportionment tool to assess  
515 the relative contributions of Topsoil-PF vs. ICD-PF. Here, we present a case-study of  
516 a shelf-slope transect in the Laptev Sea (Fig. 1) where both these source-  
517 apportionment tools for the first time can be applied, compared and evaluated. The  
518 shelf-slope transect of eight surface sediment samples stretches over 600 km from  
519 the nearshore zone (72.7°N, <10m water depth) to the continental rise (78.9°N,

Deleted: ies

Formatted: Font: Cambria, Not Italic

Formatted: Font: +Theme Body (Cambria)

Formatted: Font: +Theme Body (Cambria), 12 pt, Not Italic

Formatted: Font: 12 pt

Formatted: Font: Italic

Formatted: Font: Italic

Formatted: Font: Symbol

Formatted: Superscript

Formatted: Font: +Theme Body (Cambria), 12 pt, Not Italic

Formatted: Font: +Theme Body (Cambria), 12 pt

Formatted: Font: +Theme Body (Cambria), 12 pt, Not Italic

Formatted: Font: +Theme Body (Cambria), 12 pt

Formatted: Font: +Theme Body (Cambria), 12 pt, Not Italic

Formatted: Font: Symbol, 12 pt, Not Italic

Formatted: Font: +Theme Body (Cambria), 12 pt, Not Italic, Superscript

Formatted: Font: +Theme Body (Cambria), 12 pt, Not Italic

Formatted: Superscript

Formatted: Font: Symbol

Formatted: Superscript

521 >3000m depth) (Table 6). More molecular and bulk geochemical characteristics of  
522 these samples can be found in Bröder et al. (2016b).

523  
524 The  $\delta^{13}\text{C}-\Delta^{14}\text{C}$  source-apportionment uses three end-members (marine, Topsoil-PF,  
525 and ICD-PF). End-member values are based on previously published values (Tesi et  
526 al., 2016); with a  $\delta^{13}\text{C}$  value of  $-27.0\pm 1.2\text{‰}$  (n=38; Rodionow et al., 2006; Tesi et al.,  
527 2014; Gundelwein et al., 2007; Bird et al., 2002) for Topsoil-PF, and  $-26.3\pm 0.67\text{‰}$   
528 (n=374; Vonk et al., 2012; Schirrmeister et al., 2011) for ICD-PF. The Topsoil-PF  $\Delta^{14}\text{C}$   
529 endmember was defined as  $-232\pm 147\text{‰}$  (n=29; Winterfeld et al., 2015; Jasinski et al.,  
530 1998; Kaiser et al., 2007; Höfle et al., 2013; Palmtag et al., 2015). For ICD-PF we used  
531 a  $\Delta^{14}\text{C}$  value of  $-940\pm 84\text{‰}$  (n=300; Vonk et al., 2012 and references therein). The  
532 marine end-member value was  $-21.0\pm 2.6\text{‰}$  (n=10; Panova et al., 2015) and  $-$   
533  $50.4\pm 12\text{‰}$  (n=10; Panova et al., 2015) for  $\delta^{13}\text{C}$  and  $\Delta^{14}\text{C}$ , respectively. Calculations  
534 were made using a Markov chain Monte Carlo approach (see 2.3).

535  
536 For  $\delta^2\text{H}$  source-apportionment there is no need to include a marine end-member as  
537 marine organisms do not produce long-chain *n*-alkanes or *n*-alkanoic acids. We were  
538 unfortunately only able to analyze *n*-alkanes in the shelf-slope transect samples, and  
539 no *n*-alkanoic acids, due to limitations in sample volume. We used the  $\delta^2\text{H}$  values of  
540 the  $\text{C}_{27}$ ,  $\text{C}_{29}$  and  $\text{C}_{31}$  *n*-alkanes, individually. In other words, these three chain lengths  
541 are taken as independent markers, providing an overdetermined system (i.e. two  
542 sources defined with three different markers). This is more representative than using  
543 the average (concentration-weighted)  $\delta^2\text{H}$  value for these *n*-alkanes as the end-  
544 member values for each chain length are different. For Topsoil-PF we used  $-$   
545  $215\pm 39\text{‰}$ ,  $-246\pm 13\text{‰}$ , and  $-247\pm 23\text{‰}$  for  $\text{C}_{27}$ ,  $\text{C}_{29}$  and  $\text{C}_{31}$  *n*-alkanes, and for ICD-PF  
546 we applied  $-259\pm 18\text{‰}$ ,  $-297\pm 15\text{‰}$ , and  $-282\pm 13\text{‰}$  for  $\text{C}_{27}$ ,  $\text{C}_{29}$  and  $\text{C}_{31}$  *n*-alkanes,  
547 respectively (see also Table 5). Afterwards, we averaged the three end-member  
548 contributions derived from the three calculations for each station, thereby taking the  
549 variability introduced by the end-members into account.

550  
551 The source apportionment of OC from Topsoil-PF and ICD-PF to surface sediments  
552 along the Laptev Sea transect differ between the bulk  $\delta^{13}\text{C}-\Delta^{14}\text{C}$  and leaf wax  $\delta^2\text{H}$   
553 approaches (Table 6). The former approach suggests Topsoil-PF contributions  
554 between 21-70%, generally decreasing offshore, and, consequently, ICD-PF  
555 contributions of 30-79%, generally increasing offshore. The latter (leaf wax  $\delta^2\text{H}$ )  
556 approach results in a more extreme division of sources with Topsoil-PF contributions  
557 of 83-91% and ICD-PF contributions of 9-17%, with similar patterns nearshore and  
558 offshore (Table 6). A contribution of 9-17% may seem more in line with the estimated  
559 extent of ICD in the Lena River basin: 12% of the basin falls within the Yedomia Region  
560 (as defined by Romanovsky, 1993) and about 3% consists of intact ICD (see section  
561 2.3). However, the cross-shelf sites are also strongly influenced by coastal and/or  
562 subsea erosion (Karlsson et al. 2011; Vonk et al., 2012; Semiletov et al., 2012; 2016)  
563 so the catchment characteristics are only one part of the story. It is challenging to  
564 interpret the differences between the two proxies but we elaborate below on  
565 potential reasons.

566  
567 Assumptions in the bulk  $\delta^{13}\text{C}$ - $\Delta^{14}\text{C}$  approach may affect these results. First, the  
568 outcome of the bulk  $\delta^{13}\text{C}$ - $\Delta^{14}\text{C}$  approach is sensitive to the definition of the marine  
569 end-member. Changes in the currently used  $\delta^{13}\text{C}$  and  $\Delta^{14}\text{C}$  value of the marine end-  
570 member of the East Siberian Arctic Shelf (n=10; Panova et al., 2015) would likely alter  
571 the relative Topsoil-PF and ICD-PF contributions. The currently used standard  
572 deviation for the  $\delta^{13}\text{C}$  marine end-member is 2.6‰, which is much higher than the  
573 values for the terrestrial end-members. Second, lateral transport time enroute the  
574 shelf-slope transect (>600 kilometers) causing potentially significant aging of  
575 sediments and its organic carbon is not accounted for in the source-apportionment.  
576 Lateral transport time results in older surface OC ages on the shelf, compared to those  
577 at the initial coastal deposition. Without correcting for this factor, the source-  
578 apportionment will generate lower contributions of the (younger) Topsoil-PF  
579 component. In an attempt to estimate this effect, we recalculated (similar to Bröder  
580 et al. 2016a) the relative source contributions of Topsoil-PF, ICD-PF (and marine)  
581 with the bulk  $\delta^{13}\text{C}$ - $\Delta^{14}\text{C}$  approach with the assumption that the Topsoil-PF  $^{14}\text{C}$  age  
582 would be subject to a cross-shelf lateral transport time of 5000 yrs. We assumed a  
583 linear aging along the transect based on distance from the coast, with a maximum  
584 value of 5000 yrs aging at station SW-01. This resulted in Topsoil-PF contributions  
585 that were up to 20% higher (for the deepest stations) compared to the source-  
586 apportionment where lateral transport time was unaccounted for (Table 6; Fig. 6).  
587

588 Assumptions in the leaf wax  $\delta^2\text{H}$  source-apportionment approach could potentially  
589 also impact the outcomes, and hence differences with the bulk  $\delta^{13}\text{C}$ - $\Delta^{14}\text{C}$  results. First,  
590 there is an inherent assumption related to the molecular to bulk level upscaling  
591 challenge. We assume that the physical association of *n*-alkanes in different source  
592 end-members (Topsoil-PF vs. ICD-PF) as well as their fractionation in the coastal  
593 system is similar. However, previous research has shown that *n*-alkanes behave  
594 rather differently upon their release into coastal waters; *n*-alkanes originating from  
595 surface soil or vegetation debris are not bound to minerals and remain in suspension  
596 during transport while being actively degraded, whereas *n*-alkanes originating in  
597 deeper mineral soils settle quickly and are protected from extensive degradation  
598 (Vonk et al., 2010). It is possible that most of the *n*-alkanes in the Laptev Sea sediment  
599 transect originate in (deeper) mineral soils. An effect of physical association, as well  
600 as the potential effect of hydrodynamic sorting patterns (Tesi et al., 2016) on the leaf  
601 wax  $\delta^2\text{H}$  values of both sources could impact the source-apportionment. Another  
602 factor that can introduce a bias in our leaf wax  $\delta^2\text{H}$  approach is a proton exchange of  
603 the C-bound H-atoms in *n*-alkanes with environmental water, either from in situ  
604 sources (soil water) or during transport (river or ocean water, or sediment pore  
605 water). As there is no evidence for such exchange in young (<1 million years), cold  
606 sediments (Sessions et al., 2004) we suspect this process may be minimal in our  
607 samples (and end-members).  
608

609 When accounting for an estimated lateral transport time, the difference in estimates  
610 of source contribution by the two different approaches (bulk  $\delta^{13}\text{C}$ - $\Delta^{14}\text{C}$  and leaf wax

**Deleted:** Although t

**Deleted:** this process could be enhanced in environments of low pH. The precise effect of such exchange on the  $\delta^2\text{H}$  signal of our samples (or end-members) is unknown, but we

616  $\delta^2\text{H}$ ) increases offshore, from about a 25% difference near the coast to a 40%  
617 difference at stations SW-01 and SW-03. This increasing offset between the results of  
618 the two end-member mixing methods may be caused by several factors such as  
619 variability in the marine end-member (e.g. due to changes in seasonal ice cover), a  
620 selective degradation (of the topsoil OC) enroute that introduces a source bias or  
621 isotopic fractionation, or remaining factors related to the lateral transport time  
622 (incorrect assumption of 5000 years, non-linear aging along transect). These  
623 differences highlight that both source-apportionment tools still could be fine-tuned  
624 further by (i) increasing the sample size of sources to reduce end-member  
625 uncertainties, (ii) continuous adjustments in end-member values and Markov chain  
626 Monte Carlo calculations based on latest knowledge, and (iii) assuring regional  
627 testing and verification of the method when applied to new environments.

628

## 629 5 Conclusions

630 Leaf wax  $\delta^2\text{H}$  values in samples from aquatic recipient environments can be used to  
631 source-apportion the incoming terrestrial OC into two end-members; a Pleistocene  
632 ICD permafrost source and a younger, Holocene, topsoil source. Mean isotopic values  
633 of the  $\text{C}_{29}$  *n*-alkane,  $\text{C}_{31}$  *n*-alkane, and  $\text{C}_{28}$  *n*-alkanoic acid showed a dynamic,  
634 statistically significant range of 34, 50 and 46‰ between Topsoil-PF and ICD-PF  
635 samples, respectively, with ICD-PF samples being consistently more depleted  
636 indicative of formation during the colder and drier Pleistocene.

637

638 A case-study where we tested two isotopic proxies (leaf wax  $\delta^2\text{H}$  and bulk  $\delta^{13}\text{C}-\Delta^{14}\text{C}$ )  
639 to calculate the relative terrestrial source contribution of Topsoil-PF and ICD-PF  
640 along a Laptev Sea surface sediment transect, showed that the two proxies yield  
641 variable results but overall generate similar trends offshore. We reason that  
642 variability is caused by factors such as lateral transport time, remaining uncertainties  
643 in end-member definition, or environmental factors such as physical association.

644

645 Both methods (leaf wax  $\delta^2\text{H}$  and bulk  $\delta^{13}\text{C}-\Delta^{14}\text{C}$ ) bring along their inherent  
646 disadvantages and advantages. The molecular approach has the distinct advantage  
647 that it circumvents the uncertainties that are associated with marine end-member  
648 definition in the case of bulk OC mixing model analysis. However, application of  
649 molecular  $\delta^2\text{H}$  in source-apportionment studies brings along challenges related to the  
650 molecular-bulk upscaling step. Bulk  $\delta^{13}\text{C}-\Delta^{14}\text{C}$  source-apportionment, on the other  
651 hand, has the advantage to operate on a bulk and perhaps more representative level,  
652 but is hampered by remaining uncertainties associated with the marine end-member.

653

654 This study shows that  $\delta^2\text{H}$  of leaf wax molecules has the potential to be used in  
655 quantitative source-apportionment studies of thawing permafrost in coastal or  
656 marine settings. It can serve as an alternative or complementary approach to the  
657 commonly applied bulk  $\delta^{13}\text{C}-\Delta^{14}\text{C}$  method. We recommend continuing data collection  
658 and optimization of end-member definition and calibration. Refining the molecular  
659  $\delta^2\text{H}$  proxy presented here will be beneficial in pinpointing the location and extent of  
660 OC release from thawing permafrost in the coastal or fluvial environment. With

Formatted: Font:Symbol

Formatted: Superscript

Deleted: in order to increase our understanding of the fate of

663 [enhanced Arctic warming and associated intensification of permafrost thaw,](#)  
664 [constraining the amount and fate of permafrost OC release will help to assess the](#)  
665 [magnitude of the permafrost carbon feedback to climate warming.](#)

#### 667 **Data availability**

668 All data are available in Tables 1 through 6, as well as Supplementary Table S1.

#### 670 **Acknowledgements**

671 We would like to acknowledge Robert Spencer, Sergey Davydov, Anya Davydova,  
672 Ekatarina Bulygina, Peter Kuhry, Matthias Siewert, Juri Palmtag, Niels Weiss, Martin  
673 Kruså, Volker Brüchert, Pete Hill, Vladimir Mordukhovich, Alexander Charkin, Deniz  
674 Kosmach, Per Andersson, and sampling crew and personnel of IB Oden and RV Yakob  
675 Smirnitskiy for help with sample collection in the field. Financial support has been  
676 provided by the Dutch NWO (Veni #863.12.004), US-NSF (Polaris Project #1044610),  
677 the Bolin Centre for Climate Research, the Knut and Alice Wallenberg Foundation  
678 (SWERUS-C3 Program; KAW #2011.0027), the Swedish Research Council (VR #621-  
679 2004-4039 and 621-2007-4631), the Russian Science Foundation (#15-17-20032 to  
680 O. D.), the Nordic Council of Ministers Cryosphere-Climate-Carbon Initiative (project  
681 Defrost, #23001), the European Research Council (ERCAdG project CC-TOP #695331  
682 to Ö.G.). This study was supported by the Delta Facility of the Faculty of Science,  
683 Stockholm University. GH would like to acknowledge funding from ESF-CryoCarb and  
684 EU FP7-PAGE21 projects for topsoil and ICD sample collection. [The ISMAR](#)  
685 [publication ID is #1931.](#)

Deleted: the Russian Government (mega-grant under contract #14.Z50.31.0012 to I. S.),

Formatted: Not Highlight

#### 687 **Author contributions**

688 Land-based samples were collected by GH and JEV, ship-based samples were  
689 collected by IS, OD, ÖG, TT, LB, and JEV. Laboratory analysis was performed by LB, TT,  
690 and HH. Markov chain Monte Carlo simulations were run by AA. The manuscript was  
691 written by JEV with input of all co-authors.

#### 693 **References**

- 694 Anderson, L. G., Jutterström, S., Hjalmarsson, S., Wählström, I., and Semiletov, I.P.:  
695 Out-gassing of CO<sub>2</sub> from Siberian Shelf seas by terrestrial organic matter  
696 decomposition, *Geophys. Res. Lett.* 36, L20601, doi:10.1029/2009GL040046,  
697 2009.
- 698 Anderson, L.G., Björk, G., Jutterström, S., Pipko, I., Shakhova, N. Semiletov, I. and  
699 Wählström, I.: East Siberian Sea, an Arctic region of very high biogeochemical  
700 activity, *Biogeosciences*, 8, 1745-1754, doi:10.5194/bg-8-1745-2011, 2011.
- 701 Andersson, E., Deng, J., Du, K., Zheng, M., Yan, C., Sköld, M., and Gustafsson, Ö.:  
702 Regionally-varying combustion sources of the January 2013 severe haze events  
703 over Eastern China, *Environ. Sci. Technol.* 49(4), 2038-2043, doi:  
704 10.1021/es503855e, [2015.](#)
- 705 Bird, M. I., Santruckova, H., Arneith, A., Grigoriev, S., Gleixner, G., Kalaschnikov, Y. N.,  
706 Lloyd, J., and Schulze, E.-D.: Soil carbon inventories and carbon-13 on a latitude  
707 transect in Siberia, *Tellus*, 54B, 631-641, 2002.

Deleted: .

711 Bröder, L., Tesi, T., Salvado, J.A., Semiletov, I.P., Dudarev, O.V., and Gustafsson, Ö.:  
712 Fate of terrigenous organic matter across the Laptev Sea from the mouth of the  
713 Lena River to the deep sea of the Arctic interior, *Biogeosciences* 13, 5003, 5019,  
714 doi:10.5194/bg-13-5003-2016, 2016b.

715 Bröder, L., Tesi, T., Andersson, A., Eglinton, T.I., Semiletov, I.P., Dudarev, O.V., Roos,  
716 P., and Gustafsson, Ö.: Historical records of organic matter supply and  
717 degradation status in the East Siberian Sea, *Org. Geochem.* 91, 16-30,  
718 doi:10.1016/j.orggeochem.2015.10.008, 2016a.

719 Bosch, C., Andersson, A., Kruså, M., Bandh, C., Hovorkova, I., Klanova, J., Knowles, T.  
720 D. J., Pancost, R. D., Evershed, R. P., and Gustafsson, Ö.: Source apportionment of  
721 polycyclic aromatic hydrocarbons in central European soils with compound-  
722 specific triple isotopes ( $\delta^{13}\text{C}$ ,  $\Delta^{14}\text{C}$ , and  $\delta^2\text{H}$ ), *Environ. Sci. Technol.* 49(13), 7657-  
723 7665, doi:10.1021/acs.est.5b01190, 2015.

724 Bush, R.T., and McInerney, F.A.: Leaf wax n-alkane distributions in and across  
725 modern plants: Implications for paleoecology and chemotaxonomy, *Geochim.*  
726 *Cosmochim. Ac.* 117, 161-179, 2013.

727 Craig, H.: Isotopic variations in meteoric waters, *Science* 133: 1702-1703, 1961.  
728 Dansgaard, W.: Stable isotopes in precipitation, *Tellus*, 16, 436- 438, 1964.

729 Eglinton, G., and Hamilton, R.J.: Leaf epicuticular waxes, *Science* 156, 1322-1335,  
730 1967.

731 Gundelwein, A., Mueller-Lupp, T., Sommerkorn, M., Haupt, E. T. K., Pfeiffer, E. M., and  
732 Wiechmann, H.: Carbon in tundra soils in the Lake Labaz region of arctic Siberia,  
733 *Eur. J. Soil Sci.*, 58, 1164-1174, 2007.

734 Günther, F., Overduin, P.P., Sandakov, A.V., Grosse, G., and Grigoriev, M.N.: Short- and  
735 long-term thermo-erosion of ice-rich permafrost coasts in the Laptev Sea region,  
736 *Biogeosciences*, 10, 4297-4318, doi:10.5194/bg-10-4297-2013, 2013.

737 Hedges, J.I., and Prahl, F.G.: Early diagenesis: consequences for applications of  
738 molecular biomarkers, in *Organic Geochemistry: principles and applications*. Engel,  
739 M.H., and Macko, S.A. (ed.). Plenum Press, New York. pp 237-253, 1993.

740 Höfle, S., Rethemeyer, J., Mueller, C. W., and John, C.: Organic matter composition and  
741 stabilization in a polygonal tundra soil of the Lena Delta, *Biogeosciences*, 10, 3145-  
742 3158, doi:10.5194/bg-10-3145-2013, 2013

743 Hugelius, G. Strauss, J., Zubrzycki, S., Harden, J. W., Schuur, E. A. G., Ping, C.-L.,  
744 Schirrmeister, L., Grosse, G., Michaelson, G. J., Koven, C. D., O'Donnell, J. A., Elberling,  
745 B., Mishra, U., Camill, P., Yu, Z., Palmtag, J., and Kuhry, P.: Estimated stocks of  
746 circumpolar permafrost carbon with quantified uncertainty ranges and identified  
747 data gaps, *Biogeosciences* 11, 6573-6593, doi:10.5194/bg-11-6573-2014, 2014.

748 Jasinski, J. P. P., Warner, B. G., Andreev, A. A., Aravena, R., Gilbert, S. E., Zeeb, B. A., Smol,  
749 J. P., and Velichko, A. A.: Holocene environmental history of a peatland in the Lena  
750 River valley, Siberia, *Can. J. Earth Sci.*, 35, 637-648, 1998.

751 Johnsen, S. J., Dahl-Jensen, D., Gundestrup, N., Steffensen, J. P., Clausen, H. B., Miller,  
752 H.: Oxygen isotope and palaeotemperature records from six Greenland ice-core  
753 stations: Camp Century, Dye-3, GRIP, GISP2, Renland and NorthGRIP, *J. Quat. Sci.*  
754 16, 299-307, doi:10.1002/jqs.622, 2001.

755 Kaiser, C., Meyer, H., Biasi, C., Rusalimova, O., Barsukov, P., and Richter, A.:  
756 Conservation of soil organic matter through cryoturbation in arctic soils in

|                                                                                                                                                                                                                   |
|-------------------------------------------------------------------------------------------------------------------------------------------------------------------------------------------------------------------|
| Deleted: .                                                                                                                                                                                                        |
| Formatted: Font:12 pt, Not Italic                                                                                                                                                                                 |
| Formatted: Font:12 pt, Not Italic                                                                                                                                                                                 |
| Formatted: Font:12 pt, Not Italic                                                                                                                                                                                 |
| Formatted: Font:12 pt, Not Italic                                                                                                                                                                                 |
| Formatted: p1, Indent: Left: 0 cm, First line: 0 cm, Add space between paragraphs of the same style, Widow/Orphan control, Adjust space between Latin and Asian text, Adjust space between Asian text and numbers |
| Formatted: Font:+Theme Body (Cambria), 12 pt                                                                                                                                                                      |
| Formatted: Font:+Theme Body (Cambria)                                                                                                                                                                             |
| Deleted: .                                                                                                                                                                                                        |



- 759 Siberia, *J. Geophys. Res.-Biogeosciences*, 112, G2, doi:10.1029/2006JG000258,  
760 2007.
- 761 Karlsson, E. S., Charkin, A., Dudarev, O., Semiletov, I., Vonk, J. E., Sanchez-Garcia, L.,  
762 Andersson, A., and Gustafsson, O.: Carbon isotopes and lipid biomarker  
763 investigation of sources, transport and degradation of terrestrial organic matter  
764 in the Buor-Khaya Bay, SE Laptev Sea, *Biogeosciences* 8, 1865-1879,  
765 doi:10.5194/bg-8-1865-2011, 2011.
- 766 Karlsson, E. S., Gelting, J., Tesi, T., van Dongen, B., Andersson, A., Semiletov, I.,  
767 Charkin, A., Dudarev, O., and Gustafsson, Ö.: Different sources and degradation  
768 state of dissolved, particulate, and sedimentary organic matter along the Eurasian  
769 Arctic coastal margin, *Global Biogeochem. Cycles*, 30, 898-919,  
770 doi:10.1002/2015GB005307, 2016.
- 771 Kotler, E., and Burn, C. R.: Cryostratigraphy of the Klondike "muck" deposits,  
772 westcentral Yukon Territory, *Can. J. Earth Sci.* 37, 849-861, doi:10.1139/e00-013,  
773 2000.
- 774 Leaney, F. W., Osmond, C. B., Allison, G. B., and Ziegler, H.: Hydrogen-isotope  
775 composition of leaf water in C-3 and C-4 plants - its relationship to the hydrogen  
776 isotope composition of dry-matter, *Planta* 164 (2), 215-220, 1985.
- 777 Meyer, H., Opel, T., Laepple, T., Dereviagin, A.Y., Hoffmann, K., and Werner, M.: Long-  
778 term winter warming trend in the Siberian Arctic during the mid- to late  
779 Holocene, *Nat. Geosci.* 8, 122-125, doi:10.1038/ngeo2349, 2015.
- 780 Meyers P. A., Ishiwatari R.: Lacustrine organic geochemistry – an overview of  
781 indicators of organic matter sources and diagenesis in lake sediments, *Org.*  
782 *Geochem.* 20, 867-900, doi:10.1016/0146-6380(93)90100-P, 1993.
- 783 Meyers, P. A.: Preservation of elemental and isotopic source identification of  
784 sedimentary organic matter, *Chem. Geol.* 114, 289-302, doi:10.1016/0009-  
785 2541(94)90059-0, 1994.
- 786 Meyers, P. A.: Organic geochemical proxies of paleoceanographic, paleolimnologic  
787 and paleoclimatic processes, *Org. Geochem.* 27, 213-250, doi:10.1016/S0146-  
788 6380(97)00049-1, 1997.
- 789 Nott, C. J., Xie, S., Avsejs, L. A., Maddy, D., Chambers, F. M., Evershed, R. P.: *n*-Alkane  
790 distributions in ombrotrophic mires as indicators of vegetation change related to  
791 climatic variation, *Org. Geochem.* 31, 231-235, doi:10.1016/S0146-  
792 6380(99)00153-9, 2000.
- 793 Opel, T., Dereviagin, A. Y., Meyer, H., Schirrmeister, L., and Wetterich, S.:  
794 Palaeoclimatic information from stable water isotopes of Holocene ice wedges on  
795 the Dmitrii Laptev Strait, Northeast Siberia, Russia, *Permafrost Periglacial*  
796 *Process.*, 22, 84-100, 10.1002/ppp.667, 2011.
- 797 Opel, T., Wetterich, S., Meyer, H., Dereviagin, A.Y., Fuchs, M.C., and Schirrmeister, L.:  
798 Ground-ice stable isotopes and cryostratigraphy reflect late Quaternary  
799 palaeoclimate in the Northeast Siberian Arctic (Oyogos Yar coast, Dmitry Laptev  
800 Strait), *Clim. Past Discuss.*, doi:10.5194/cp-2017-1, 2017.
- 801 Palmtag J., Hugelius G., Lashchinskiy N., Tamstorf M.P., Richter A., Elberling B. and  
802 Kuhry, P.: Storage, Landscape Distribution, and Burial History of Soil Organic  
803 Matter in Contrasting Areas of Continuous Permafrost, Arctic, Antarctic, and Alpine  
804 Research, 47(1), 71-88, doi: http://dx.doi.org/10.1657/AAAR0014-027, 2015.

Deleted: .

Deleted: .

Deleted: .

Formatted: Font:(Default) Times New Roman

Deleted: (2015)

809 Polissar, P. J., and Freeman, K. H.: Effects of aridity and vegetation on plant-wax dD in  
810 modern lake sediments, *Geochim. Cosmochim. Ac.* 74, 5785-5797,  
811 doi:10.1016/j.gca.2010.06.018, 2010.

812 Panova, E., Tesi, T., Pearce, C., Salvado, J. A., Karlsson, E. S., Kruså, M., Semiletov, I. P.,  
813 and Ö. Gustafsson: Geochemical compositional differences of the supramicron  
814 plankton-dominated fraction in two regimes of the Marginal Ice Zone (MIZ) of the  
815 outer East Siberian Arctic Shelf, AGU Fall meeting 2015 abstract, 2015.

816 Pautler, B. G., Reichart, G.-J., Sanborn, P. T., Simpson, M. J., Weijers, J. W. H.:  
817 Comparison of soil derived tetraether membrane lipid distributions and plantwax  
818 dD compositions for reconstruction of Canadian Arctic temperatures,  
819 *Palaeogeogr. Palaeoclimatol. Palaeoecol.* 404, 78-88,  
820 doi:10.1016/j.palaeo.2014.03.038, 2014

821 Porter, T. J., Froese, D. G., Feakins, S. J., Bindeman, I. N., Mahoney, M. E., Pautler, B. G.,  
822 Reichart, G.-J., Sanborn, P. T., Simpson, M. J., and Weijers, J. W. H.: Multiple water  
823 isotope proxy reconstruction of extremely low last glacial temperatures in  
824 Eastern Beringia (Western Arctic), *Quat. Sci. Rev.* 137, 113-125,  
825 doi:10.1016/j.quascirev.2016.02.006, 2016.

826 Rodionow, A., Flessa, H., Kazansky, O., and Guggenberger, G.: Organic matter  
827 composition and potential trace gas production of permafrost soils in the forest  
828 tundra in northern Siberia, *Geoderma*, 135, 49-62, 2006.

829 Romanovsky, N. N.: Fundamentals of the cryogenesis of the lithosphere. University  
830 Press, Moscow, pp. 1-336 (in Russian), 1993.

831 Sachse, D., Radke, J., and Gleixner, G.: Hydrogen isotope ratios of recent lacustrine  
832 sedimentary n-alkanes record modern climate variability, *Geochim. Cosmochim.*  
833 *Ac.*, 68, 4877-4889, doi:10.1016/j.gca.2004.06.004, 2004.

834 Schuur, E. A. G., McGuire, A. D., Schädel, C., Grosse, G., Harden, J. W., Hayes, D. J.,  
835 Hugelius, G., Koven, C. D., Kuhry, P., Lawrence, D. M., Natali, S. M., Olefeldt, D.,  
836 Romanovsky, V. E., Schaefer, K., Turetsky, M. R., Treat, C. C., and Vonk, J. E.:  
837 Climate change and the permafrost carbon feedback, *Nature*, 250, 171-178,  
838 doi:10.1038/nature14338, 2015.

839 Schirrmeister, L., Kunitzky, V. V., Grosse, G., Wetterich, S., Meyer, H., Schwamborn, G.,  
840 Babiy, O., Derevyagin, A., and Siegert, C.: Sedimentary characteristics and origin of  
841 the Late Pleistocene Ice Complex on north-east Siberian Arctic coastal lowlands  
842 and islands – A review, *Quatern. Int.* 241, 3-25, doi:10.1016/j.quaint.2010.04.004,  
843 2011.

844 Semiletov I.P., Pipko I.I., Shakhova N.E., Dudarev O.V., Pugach S.P., Charkin A.N., McRoy  
845 C.P., Kosmach D., and Gustafsson, Ö: Carbon transport by the Lena River from its  
846 headwaters to the Arctic Ocean, with emphasis on fluvial input of terrestrial  
847 particulate organic carbon vs. carbon transport by coastal erosion, *Biogeosciences*,  
848 8, 2407-2426, 2011.

849 Semiletov I.P., Shakhova N. E., Sergienko V.I., Pipko I.I., and O. Dudarev: On Carbon  
850 Transport and Fate in the East Siberian Arctic Land-Shelf-Atmosphere System,  
851 *Environment Res. Lett.*, 7, doi:10.1088/1748-9326/7/1/015201, 2012.

852 Semiletov, I.P., Shakhova, N.E., Pipko, I.I., Pugach, S.P., Charkin, A.N., Dudarev, O.V.,  
853 Kosmach, D.A., and S. Nishino (2013). Space-time dynamics of carbon and

Deleted: t

855 environmental parameters related to carbon dioxide emissions in the Buor-Khaya  
856 Bay of the Laptev Sea, *Biogeosciences*, 10, 5977-5996, doi:10.5194/bg-10-5977-  
857 2013

858 Semiletov I., Pipko I., Gustafsson O., Anderson L., Sergienko V., Pugach S., Dudarev O.,  
859 Charkin A., Broder L., Andersson A., Spivak E., and N. Shakhova (2016),  
860 Acidification of the East Siberian Arctic Shelf waters through addition of  
861 freshwater and terrestrial carbon, *Nature Geoscience*, doi:10.1038/NEGO 2695,  
862 2016.

863 Semiletov I.P., Pipko, I.I., Pivovarov, N.Y., Popov, V. V., Zimov, S. A., Voropaev, Y. V.,  
864 and S.P. Davydov: Atmospheric carbon emissions from northern lakes: a factor of  
865 global significance, *Atmospheric Environment*, 30, 1657-1671, 1996a.

866 Semiletov I.P., Pivovarov, N.Y., Pipko, I. I., Gukov, A. Y., Volkova, T. I., Sharp, J. P.,  
867 Shcherbakov, Y. S., and K. P. Fedorov: Dynamics of dissolved CH<sub>4</sub> and CO<sub>2</sub> in the  
868 Lena River Delta and Laptev Sea. *Transactions (Doklady) of the Russian Academy  
869 of Sciences*, 350 (3), 401-404 (translated into English), 1996b.

870 Semiletov, I.P.: Destruction of the coastal permafrost ground as an important factor  
871 in biogeochemistry of the Arctic Shelf waters, *Trans. (Doklady) Russian Acad. Sci.*,  
872 368, 679-682 (translated into English), 1999.

873 Sessions, A.L., Burgoyne, T.W., and Hayes, J.M.: Determination of the H3 factor in  
874 hydrogen isotope ratio mass spectrometry, *Anal. Chem.* 73(2), 200-207, 2001.

875 Siewert, M.B., Hanisch, J., Weiss, N., Kuhry, P., Maximov, T.C., Hugelius, G.: Comparing  
876 carbon storage of Siberian tundra and taiga permafrost ecosystems at very high  
877 spatial resolution. *J. Geophys. Res.: Biogeosciences*, 120,  
878 doi:10.1002/2015JG002999, 2015.

879 Siewert, M.B., Hugelius, G., Heim, B., Faucherre, S.: Landscape controls and vertical  
880 variability of soil organic carbon storage in permafrost-affected soils of the Lena  
881 River Delta. *Catena*, 147, 725-741. doi:10.1016/j.catena.2016.07.048, 2016.

882 Soil Survey Staff. *Keys to Soil Taxonomy*, 12th ed., U.S. Department of Agriculture &  
883 Natural Resources Conservation Service, Washington, D. C., 2014.

884 Sessions, A. L., Burgoyne, T.W., Schimmelmann, A., and Hayes, J. M.: Fractionation of  
885 hydrogen isotopes in lipid biosynthesis, *Org. Geochem.*, 30, 1193-1200,  
886 doi:10.1016/S0146-6380(99)00094-7, 1999.

887 Sessions, A.L., Sylva, S.P., Summons, R.E., and Hayers, J.M.: Isotopic exchange of  
888 carbon-bound hydrogen over geologic timescales, *Geochim. Cosmochim. Ac.* 68,  
889 1545-1559, doi:10.1016/j.gca.2003.06.004, 2004.

890 Shakhova, N. and I. Semiletov: Methane release and coastal environment in the East  
891 Siberian Arctic shelf, *Journal of Marine Systems*, 66 (1-4), 227-243, 2007.

892 Shakhova, N., Semiletov I., Leifer, I., , Sergienko, V., Salyuk, A., Kosmach, D., Chernikh  
893 D., Stubbs Ch., Nicolsky D., Tumskoy V., and O. Gustafsson: Ebullition and storm-  
894 induced methane release from the East Siberian Arctic Shelf, *Nature Geoscience*  
895 7-1, 64-70, doi: 10.1038/NGEO2007, 2014.

896 Shakhova N., I. Semiletov, V. Sergienko, L. Lobkovsky, V. Yusupov, A. Salyuk, A.  
897 Salomatin, D. Chernykh, D. Kosmach, G. Panteleev, D. Nicolsky, V. Samarkin, S.  
898 Joye, A. Charkin, O. Dudarev, A. Meluzov, and Ö. Gustafsson: The East Siberian  
899 Arctic Shelf: towards further assessment of permafrost-related methane fluxes and

Deleted: ournal of

Deleted: ical

Deleted: earch

Deleted: (2014),

Deleted: .

905 role of sea ice. *Phil. Trans. R. Soc. A*, vol. 373: 20140451.  
906 doi:10.1098/rsta.2014.0451, 2015.

907 Shanahan, T.M., Hughen, K.A., Ampel, L., Sauer, P.E., and Fornace, K.: Environmental  
908 controls on the 2H/1H values of terrestrial leaf waxes in the eastern Canadian  
909 Arctic, *Geochim. Cosmochim. Ac.* 119, 286-301, doi:10.1016/j.gca.2013.05.032,  
910 2013.

911 Shiklomanov, N. I., Streletskiy, D. A., Little, J. D., and Nelson, F. E.: Isotropic thaw  
912 subsidence in undisturbed permafrost landscapes, *Geophys. Res. Lett.* 40, 6356-  
913 6361, doi:10.1002/2013GL058295, 2013.

914 Smith, F.A., and Freeman, K.H.: Influence of physiology and climate on dD of leaf wax  
915 n-alkanes from C3 and C4 grasses, *Geochim. Cosmochim. Ac.* 70, 1172-1187,  
916 doi:10.1016/j.gca.2005.11.006, 2006.

917 Strauss, J., Schirrmeister, L., Grosse, G., Wetterich, S., Ulrich, M., Herzschuh, U., and  
918 Hubberten, H.-W.: The deep permafrost carbon pool of the Yedoma region in  
919 Siberia and Alaska. *Geophys. Res. Lett.* 40, 6165-6170,  
920 doi:10.1002/2013GL058088, 2013.

921 Tesi, T., I. Semiletov, G. Hugelius, O. Dudarev, P. Kuhry, and Gustafsson, Ö.:  
922 Composition and fate of terrigenous organic matter along the Arctic land-ocean  
923 continuum in East Siberia: insights from biomarkers and carbon isotopes,  
924 *Geochim. Cosmochim. Acta*, 133, 235-256, 2014.

925 Tesi, T., Semiletov, I., Dudarev, O., Andersson, A., and Gustafsson, Ö.: Matrix  
926 association effects on hydrodynamic sorting and degradation of terrestrial organic  
927 matter during cross-shelf transport in the Laptev and East Siberian shelf seas, *J.*  
928 *Geophys. Res.-Biogeosciences*, 121, 731-752, doi:10.1002/2015JG003067, 2016a.

929 Tesi, T., Muschitiello, F., Smittenberg, R. H., Jakobsson, M., Vonk, J. E., Hill, P.,  
930 Andersson, A., Kirchner, N., Noormets, R., Dudarev, O., Semiletov, I., and Gustafsson,  
931 Ö.: Massive remobilization of permafrost carbon during post-glacial warming, in  
932 review at *Nature Communications*, 2016b.

933 Vonk, J. E., van Dongen, B. E., and Gustafsson, Ö.: Selective preservation of old organic  
934 carbon fluvially released from sub-arctic soils, *Geophys. Res. Lett.* 37, L11605,  
935 2010

936 Vonk, J. E., Sánchez-García, L., van Dongen, B. E., Alling, V., Kosmach, D., Charkin, A.,  
937 Semiletov, I. P., Dudarev, O. V., Shakhova, N., Roos, P., Eglinton, T. I., Andersson, A.,  
938 and Gustafsson, Ö.: Activation of old carbon by erosion of coastal and subsea  
939 permafrost in Arctic Siberia, *Nature*, 489, 137-140, doi:10.1038/nature11392,  
940 2012.

941 Vonk, J. E., and Gustafsson, Ö.: Permafrost-carbon complexities, *Nat. Geosci.* 6, 675-  
942 676, doi:10.1038/ngeo1937, 2013.

943 Vonk, J. E., Mann, P. J., Davydov, S., Davydova, A., Spencer, R. G. M., Schade, J.,  
944 Sobczak, W. V., Zimov, N., Zimov, S., Bulygina, E., Eglinton, T. I., and Holmes, R. M.:  
945 High biolability of ancient permafrost carbon upon thaw, *Geophys. Res. Lett.*, 40,  
946 2689-2693, doi:10.1002/grl.50348, 2013.

947 Vonk, J. E., Semiletov, I. P., Dudarev, O. V., Eglinton, T. I., Andersson, A., Shakhova, N.,  
948 Charkin, A., Heim, B., and Gustafsson, Ö.: Preferential burial of permafrost-derived  
949 organic carbon in Siberian-Arctic shelf waters, *J. Geophys. Res. Oceans* 119, 8410-  
950 8421, doi:10.1002/2014JC010261, 2014.

951 Vonk, J. E., Tank, S. E., Bowden, W. B., Laurion, I., Vincent, W. F., Alekseychik, P., Amyot,  
 952 M., Billet, M. F., Canario, J., Cory, R. M., Deshpande, B. N., Helbig, M., Jammet, M.,  
 953 Karlsson, J., Larouche, J., MacMillan, G., Rautio, M., Walter Anthony, K. M., and  
 954 Wickland, K. P.: Effects of permafrost thaw on Arctic aquatic ecosystems,  
 955 Biogeosciences 12, 7129-7167, doi:10.5194/bg-12-7129-2015, 2015.

956 Walvoord, M. A., Voss, C. I., and Wellman, T. P.: Influence of permafrost distribution  
 957 on groundwater flow in the context of climate-driven permafrost thaw: Example  
 958 from Yukon Flats Basin, Alaska, United States, Water Resour. Res. 48, W07524,  
 959 doi:10.1029/2011WR011595, 2012.

960 Weiss N, Blok D, Elberling B, Hugelius G, Jørgensen CJ, Siewert MB, Kuhry P:  
 961 Thermokarst dynamics and soil organic matter characteristics controlling initial  
 962 carbon release from permafrost soils in the Siberian Yedoma region. Sedimentary  
 963 Geology, <http://dx.doi.org/10.1016/j.sedgeo.2015.12.004>, 2015.

964 [Wetterich, S., Tumskey, V., Rudaya, N., Kuznetsov, V., Maksimov, F., Opel, T., Meyer,](#)  
 965 [H., Andreev, A. A., and Schirrmeister, L.: Ice Complex permafrost of MIS5 age in](#)  
 966 [the Dmitry Laptev Strait coastal region \(East Siberian Arctic\), Quaternary Science](#)  
 967 [Reviews, 147, 298-311, 10.1016/j.quascirev.2015.11.016, 2016.](#)

968 Wiesenberg, G., Schwark, L., ~~and~~ Schmidt, M.: Improved automated extraction and  
 969 separation procedure for soil lipid analyses. European Journal of Soil Science 55,  
 970 349-356, 2014.

971 Wilkie, K.M.K., Chaplignin, B., Meyer, H., Burns, S., Petsch, S., and Brigham-Grette, J.:  
 972 Modern isotope hydrology and controls on dD of plant leaf waxes at Lake  
 973 El'gygytgyn, NE Russia, Clim. Past 9, 335-352, doi:10.5194/cp-9-335-2013, 2013.

974 Winterfeld, M., Lepple, T., and Mollenhauer, G.: Characterization of particulate  
 975 organic matter in the Lena River delta and adjacent nearshore zone, NE Siberia –  
 976 Part I: Radiocarbon inventories, Biogeosciences, 12, 3769-3788, doi:10.5194/bg-  
 977 12-3769-2015, 2015.

978 Yang, H., Liu, W., Leng, Q., Hren, M.T., and Pagani, M.: Variation in n-alkane dD values  
 979 from terrestrial plants at high latitude: implications for paleoclimate  
 980 reconstruction, Org. Geochem. 42, 283-288,  
 981 doi:10.1016/j.orggeochem.2011.01.006, 2011.

982 Zech, R., Huang, Y., Zech, M., Tarozo, R., and W. Zech: High carbon sequestration in  
 983 Siberian permafrost loess-paleosols during glacials, Clim. Past, 7, 501-509,  
 984 doi:10.5194/cp-7-501-2011, 2011.

985 Zimov, S.A., Semiletov, I. P. Daviodov, S. P., Voropaev, Y. V., Prosyannikov, S. F., Wong,  
 986 C. S., and Y.-H. Chan: Wintertime CO<sub>2</sub> emission from soils of Northeastern Siberia.  
 987 Arctic, 46, 197-204, 1993.

988

|                |
|----------------|
| Deleted: ,     |
| Deleted: 2004. |
| Deleted: .     |

992 **Figure 1**  
 993 Map of coastal northeast Siberia showing the extent of ice complex permafrost (ICD; red)  
 994 overlaid with the location of ice complex (n=9; black diamonds) and topsoil samples  
 995 (n=9; green squares). The shelf-slope Laptev Sea transect is shown with yellow stars.  
 996  
 997

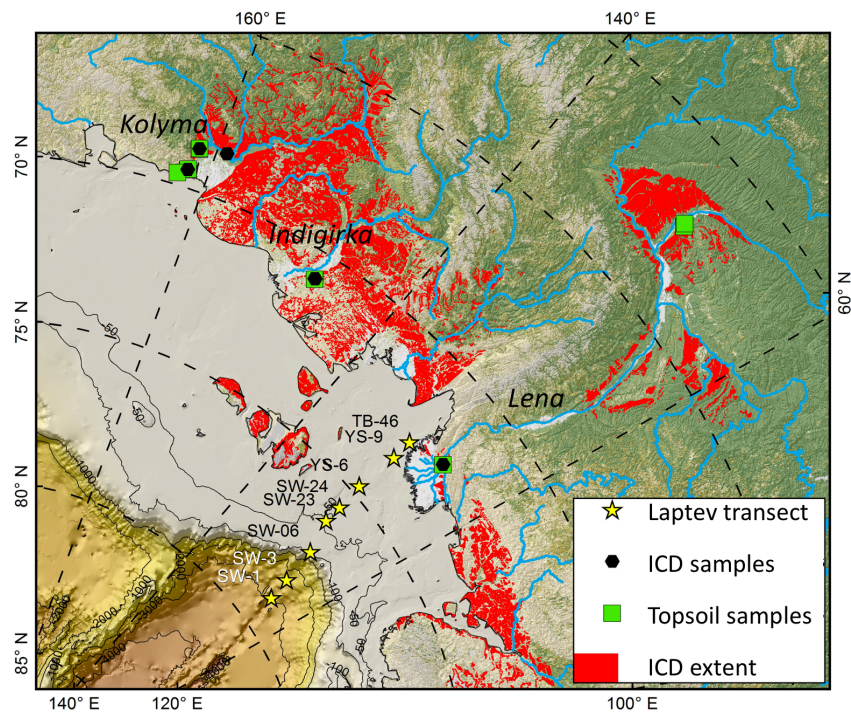

998  
 999

1000 **Figure 2**  
 1001 Molecular concentrations and ratios of topsoil Holocene permafrost (green;  $n=9$ ) and  
 1002 deeper Pleistocene permafrost (blue;  $n=9$ ) samples, with (a) the sum of odd  $n$ -alkanes  
 1003  $C_{25}$ - $C_{31}$ , (b) the sum of even  $n$ -alkanoic acids  $C_{22}$ - $C_{28}$ , (c) the Carbon Preference Index  
 1004 (CPI) for  $n$ -alkanes  $C_{23}$ - $C_{31}$ , (d), the CPI for  $n$ -alkanoic acids  $C_{22}$ - $C_{28}$ , (e) the ratio of  $C_{23}$   
 1005 over  $C_{23}+C_{29}$   $n$ -alkanes, and (f) the sum of high-molecular weight (HMW)  $n$ -alkanoic  
 1006 acids over HMW  $n$ -alkanes. The CPI is calculated as  $CPI_{i-n} = \frac{1}{2} \frac{\sum (X_i+X_{i+2}+\dots+X_n)}{\sum (X_{i-1}+X_{i+1}+\dots+X_{n-1}) + \frac{1}{2} \sum (X_i+X_{i+2}+\dots+X_n)}$ , where  $X$  is  
 1007 concentration. Stars indicate that the two compared values are statistically significant  
 1008 (95% confidence). Note that panel a and b are reported as median with IQR (interquartile  
 1009 range) and the other panels are reported as average  $\pm$  standard deviation.  
 1010  
 1011

Deleted: 5  
 Deleted: 5  
 Deleted: ±

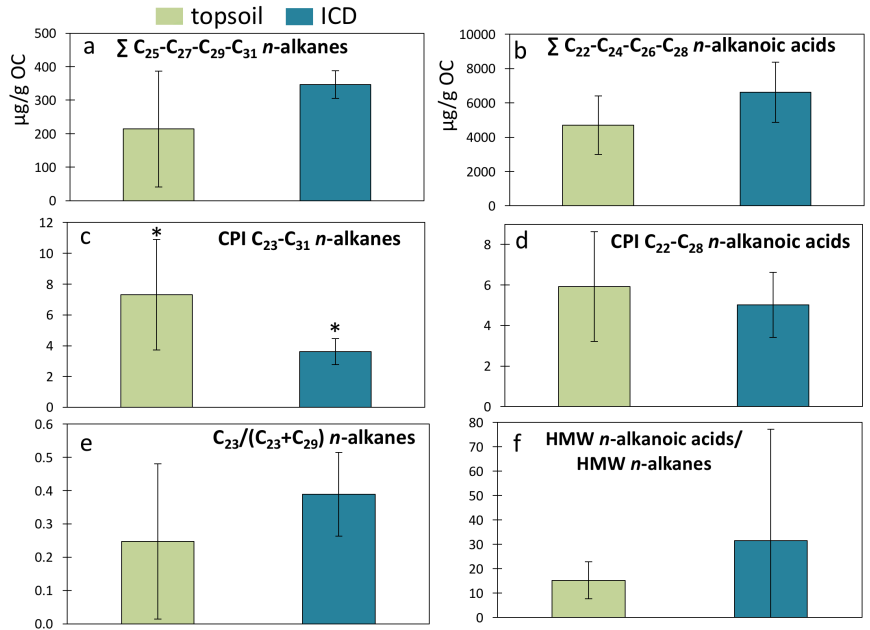

1012  
 1013

1017 **Figure 3**  
 1018 Molecular isotopic signature against chain length of long chain *n*-alkanoic acids (top) and  
 1019 *n*-alkanes (bottom) for Holocene topsoil samples (green) and Pleistocene ice complex  
 1020 samples (ICD; blue). Stars indicate that the two compared values are statistically  
 1021 significant (95% confidence). Standard deviations are represented as vertical bars, and  
 1022 are smaller than the sample circles when not visible.  
 1023

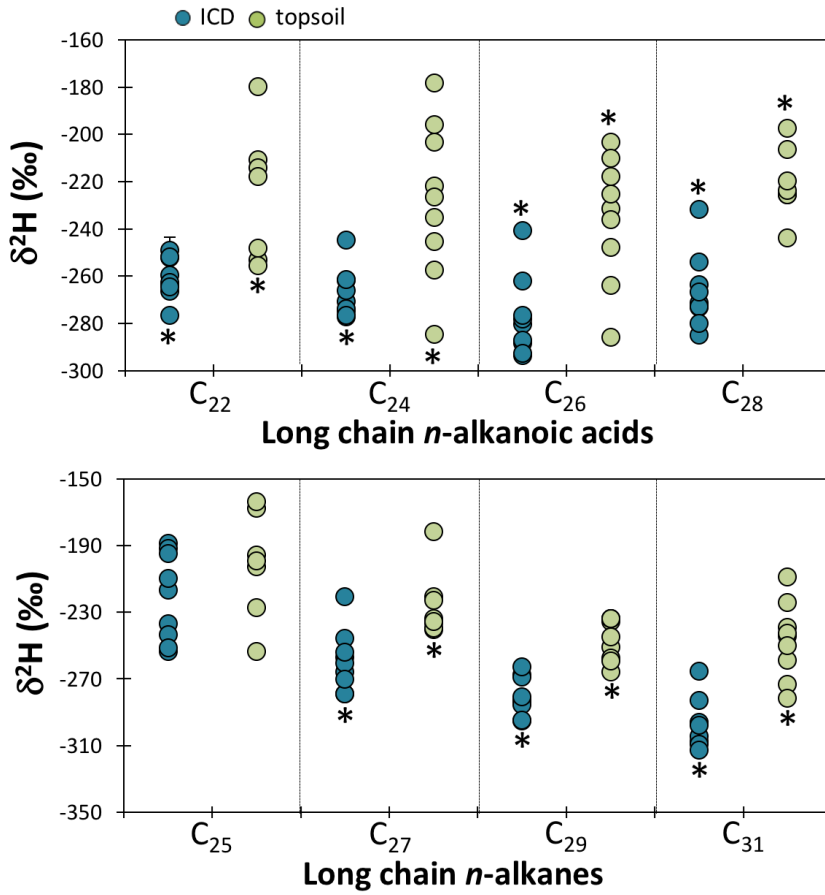

1024  
 1025  
 1026  
 1027  
 1028



1029 **Figure 4**  
1030 Concentration-weighted mean  $\delta^2\text{H}$  values of  $\text{C}_{27}\text{-C}_{29}\text{-C}_{31}$  *n*-alkanes plotted against  
1031 concentration-weighted mean  $\delta^2\text{H}$  values of  $\text{C}_{24}\text{-C}_{26}\text{-C}_{28}$  *n*-alkanoic acids to illustrate the  
1032 fractionation differences between these two leaf wax markers. Dashed line indicates an  
1033 identical fractionation.  
1034

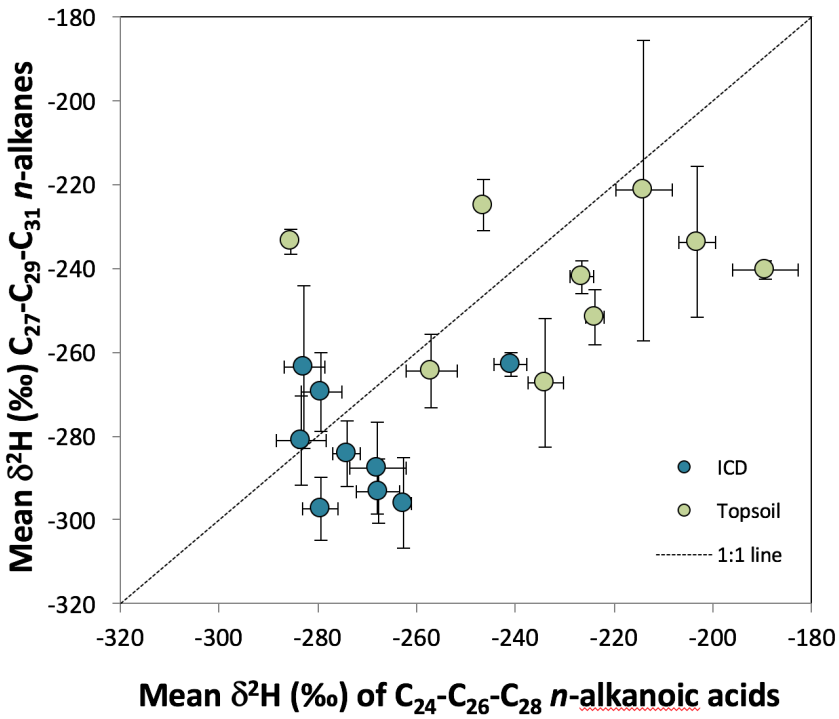

1035  
1036

1037 **Figure 5**  
 1038 Comparison of  $\delta^2\text{H}$  values of  $\text{C}_{28}$  *n*-alkanoic acid (left) and  $\text{C}_{29}$  *n*-alkane (right) in  
 1039 modern (Topsoil-PF; green circles) and ICD-PF for this study (blue circles) and  
 1040 available literature, with crosses from Zech et al. (2011; glacial and interglacial  
 1041 paleosoils from permafrost bluff exposure at Tumara River northeast Siberia), black  
 1042 triangles from Yang et al. (2011; C3 plants and trees from Canada and Alaska), light  
 1043 grey triangles from Wilkie et al. (2013; C3 plants from the El'gygytgyn lake basin,  
 1044 Siberia), white triangles from Pautler et al. (2014; modern and paleosoils from the  
 1045 Yukon territory, Canada) and dark grey triangles from Porter et al. (2016; muck  
 1046 deposits from the Yukon territory, Canada).  
 1047

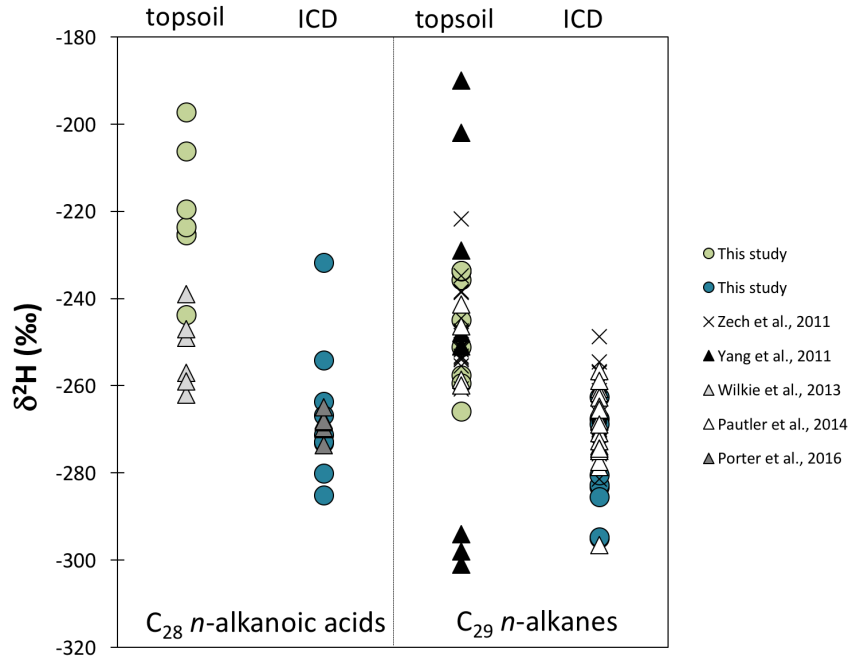

1048  
 1049  
 1050  
 1051

1052 **Figure 6**  
 1053 Contribution of OC from Topsoil-PF (green) and ICD-PF (blue) sources to surface  
 1054 sediments along a shelf-slope transect in the Laptev Sea (see also Bröder et al., 2016b for  
 1055 further transect information), calculated with a  $\delta^{13}\text{C}$ - $\Delta^{14}\text{C}$  (triangles) and leaf wax  $\delta^2\text{H}$   
 1056 mixing model (circles). Stations are plotted against log water depth (m; see also Table 6)  
 1057 following the transect order from the coastal, nearshore, zone in the South (furthest left;  
 1058 TB-46, 6 m depth) towards the continental rise in the North (furthest right; SW-01, 3146  
 1059 m depth). Topsoil  $\Delta^{14}\text{C}$  end-member values are corrected for cross-shelf transport time  
 1060 (see section 4.2).  
 1061

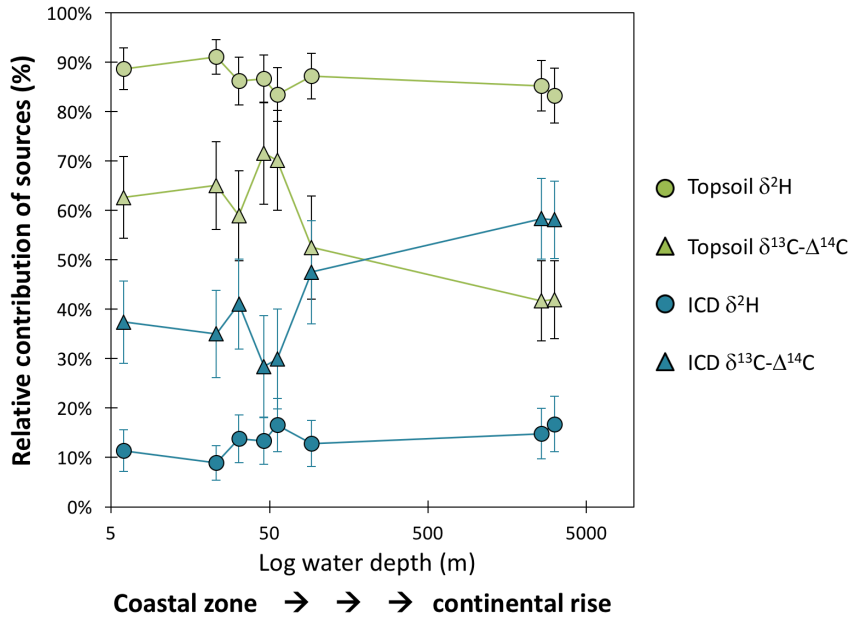

1062

**Table 1**

Site characteristics and geochemical properties of eight topsoil and eight ice complex deposit samples. A table with more detailed sample descriptions can be found in Supplementary Table 1.

| Sample code                                              | Sample ID                  | Current vegetation | Watershed | Description                                          | Lat   | Lon    | TOC       | $\delta^{13}\text{C}$ | $^{14}\text{C}$ yrs |                        |      |
|----------------------------------------------------------|----------------------------|--------------------|-----------|------------------------------------------------------|-------|--------|-----------|-----------------------|---------------------|------------------------|------|
|                                                          |                            |                    |           |                                                      | °N    | °E     | %         | ‰                     | %                   | %                      | %    |
| <b>Topsoil (modern vegetation and O-horizon samples)</b> |                            |                    |           |                                                      |       |        |           |                       |                     |                        |      |
| TS-1                                                     | KU EXP 1-1, 0-16 cm        | Tundra             | Lena      | Surface O-horizon; 0-16 cm                           | 72.34 | 126.29 | 11        | -27.0                 | n.a.                | 0.40                   | 27.5 |
| TS-2                                                     | CH YED2, 0-4 cm            | Tundra             | Kolyma    | Surface O-A horizon; 0-4 cm                          | 69.46 | 161.79 | 17        | -28.4                 | n.a.                | 0.64                   | 26.5 |
| TS-3                                                     | SP T3-3B,                  | Alas grassland     | Lena      | Alas soil (Mollisol), mix of O and A horizon         | 62.32 | 129.50 | 15        | -27.9                 | n.a.                | 1.40                   | 10.7 |
| TS-4                                                     | SP T2-7,                   | Larch taiga        | Lena      | Taiga soil (turbel), mix of O and A horizon          | 62.25 | 129.62 | 13        | -28.4                 | n.a.                | 0.45                   | 28.0 |
| TS-5                                                     | KY T2-3,                   | Tussock tundra     | Indigirka | Tundra soil (turbel), O-horizon                      | 70.83 | 147.48 | 29        | -28.5                 | n.a.                | 1.56                   | 18.7 |
| TS-6                                                     | CH T2-1,                   | Tussock tundra     | Kolyma    | Tundra soil (turbel), mix of O, Ojj and Ajj horizons | 69.44 | 161.77 | 21        | -26.4                 | n.a.                | 0.57                   | 36.7 |
| TS-7                                                     | CH YED3, 0-10 cm           | Larch taiga        | Kolyma    | Surface O-hor; 0-10 cm                               | 68.77 | 161.41 | 39        | -29.6                 | n.a.                | 1.29                   | 30.7 |
| TS-8G <sup>a</sup>                                       | CH Medv grass <sup>a</sup> | Grass tundra       | Kolyma    | Vegetation                                           | 69.64 | 162.54 | 41        | -25.2                 | n.a.                | Formatted: Superscript |      |
| TS-9G <sup>a</sup>                                       | CH Y4 grass <sup>a</sup>   | Larch taiga        | Kolyma    | Vegetation                                           | 68.74 | 161.41 | 40        | -28.5                 | n.a.                | Formatted: Superscript |      |
| <b>Mean values</b>                                       |                            |                    |           |                                                      |       |        | <b>25</b> | <b>-27.8</b>          | <b>1.1</b>          | <b>24.8</b>            |      |
| <b>Ice complex deposits</b>                              |                            |                    |           |                                                      |       |        |           |                       |                     |                        |      |
| ICD-1                                                    | KU EXP 1-3, 212-216 cm     | Tundra             | Lena      | Very deep undisturbed yedoma ca. 10 m below surface  | 72.34 | 126.29 | 1.3       | -27.5                 | n.a.                | 0.08                   | 15.7 |
| ICD-2                                                    | CH YED1, 300-305 cm        | Tussock tundra     | Kolyma    | Deep undisturbed yedoma ca. 3 m below surface        | 69.47 | 161.77 | 1.4       | -26.3                 | n.a.                | 0.14                   | 10.2 |
| ICD-3                                                    | CH YED2, 300-305 cm        | Tussock tundra     | Kolyma    | Deep undisturbed yedoma ca. 3 m below surface        | 69.46 | 161.79 | 2.3       | -25.8                 | n.a.                | 0.27                   | 8.6  |
| ICD-4                                                    | CH YED3, 520-525 cm        | Larch taiga        | Kolyma    | Deep undisturbed yedoma ca. 5 m below surface        | 68.77 | 161.41 | 1.4       | -25.5                 | n.a.                | 0.15                   | 9.7  |
| ICD-5                                                    | KY EXP1, 0-5 cm            | Tussock tundra     | Indigirka | Undisturbed yedoma ca. 2 m below surface             | 70.83 | 147.44 | 1.5       | -25.5                 | 27920               | 0.18                   | 8.5  |
| ICD-6                                                    | KY EXP2, 110-115 cm        | Tussock tundra     | Indigirka | Deep undisturbed yedoma ca. 4.5 m below surface      | 70.83 | 147.44 | 1.6       | -25.6                 | 17270               | 0.19                   | 8.6  |
| ICD-7                                                    | KY EXP3, 185-190 cm        | Tussock tundra     | Indigirka | Undisturbed yedoma ca. 2 m below surface             | 70.83 | 147.49 | 1.5       | -25.2                 | ±210<br>±80         | 0.17                   | 8.5  |

|              |                    |             |        |                                      |       |        |                  |                    |              |             |   |
|--------------|--------------------|-------------|--------|--------------------------------------|-------|--------|------------------|--------------------|--------------|-------------|---|
| <u>ICD-8</u> | CH DY-3A           | Larch taiga | Kolyma | Particulate matter from thaw streams | 68.63 | 159.15 | 1.5 <sup>b</sup> | -25.2 <sup>b</sup> | <u>19370</u> | -           | - |
| <u>ICD-9</u> | CH DY-4A           | Larch taiga | Kolyma | Particulate matter from thaw streams | 68.63 | 159.15 | 1.4 <sup>b</sup> | -25.1 <sup>b</sup> | <u>28040</u> | -           | - |
|              | <b>Mean values</b> |             |        |                                      |       |        | <b>1.6</b>       | <b>-25.7</b>       | <b>0.2</b>   | <b>10.0</b> |   |

a vegetation/grass samples, labelled with "G"

b data from Vonk et al., 2013

**Table 2**

Long-chain *n*-alkane concentrations (in µg/gOC) of topsoil Holocene samples (modern vegetation/O-horizon) and Pleistocene ice complex samples.

|                                                          | C21     | C22 | C23 | C24 | C25 | C26 | C27 | C28 | C29 | C30 | C31 | C32 | C33 |
|----------------------------------------------------------|---------|-----|-----|-----|-----|-----|-----|-----|-----|-----|-----|-----|-----|
|                                                          | µg/g OC |     |     |     |     |     |     |     |     |     |     |     |     |
| <b>Topsoil (modern vegetation and O-horizon samples)</b> |         |     |     |     |     |     |     |     |     |     |     |     |     |
| <u>TS-1</u>                                              | 44      | 88  | 96  | 45  | 41  | 10  | 45  | 4.4 | 27  | 2.5 | 36  | 1.5 | 7.2 |
| <u>TS-2</u>                                              | 24      | 15  | 21  | 12  | 40  | 10  | 160 | 10  | 150 | 6.5 | 150 | 3.5 | 17  |
| <u>TS-3</u>                                              | 2.5     | 2.4 | 5.9 | 2.6 | 13  | 4.7 | 42  | 16  | 74  | 4.7 | 85  | 2.7 | 24  |
| <u>TS-4</u>                                              | 19      | 3.3 | 7.1 | 2.7 | 27  | 4.5 | 47  | 6.7 | 98  | 9.1 | 150 | 5.7 | 38  |
| <u>TS-5</u>                                              | 35      | 8.4 | 26  | 9.9 | 38  | 13  | 91  | 18  | 180 | 14  | 230 | 8.1 | 43  |
| <u>TS-6</u>                                              | 14      | 5.1 | 16  | 5.7 | 19  | 4.0 | 26  | 3.7 | 48  | 5.0 | 120 | 4.0 | 32  |
| <u>TS-7</u>                                              | 46      | 12  | 18  | 8.8 | 22  | 16  | 61  | 27  | 220 | 23  | 340 | 12  | 48  |
| <u>TS-8G</u>                                             | 4.1     | 1.7 | 18  | 10  | 61  | 16  | 47  | 13  | 30  | 5.3 | 10  | 1.1 | 1.1 |
| <u>TS-9G</u>                                             | 4.7     | 2.6 | 18  | 15  | 45  | 21  | 50  | 16  | 31  | 6.8 | 9.8 | 1.5 | 2.6 |
| <b>Ice complex deposits</b>                              |         |     |     |     |     |     |     |     |     |     |     |     |     |
| <u>JCD-1</u>                                             | 57      | 79  | 100 | 49  | 82  | 23  | 170 | 16  | 137 | 8.5 | 140 | 4.4 | 25  |
| <u>JCD-2</u>                                             | 55      | 89  | 100 | 70  | 70  | 27  | 75  | 20  | 130 | 12  | 120 | 5.3 | 28  |
| <u>JCD-3</u>                                             | 40      | 64  | 74  | 31  | 54  | 15  | 79  | 22  | 110 | 10  | 160 | 4.8 | 32  |
| <u>JCD-4</u>                                             | 60      | 93  | 98  | 47  | 55  | 20  | 84  | 22  | 140 | 12  | 150 | 6.0 | 39  |
| <u>JCD-5</u>                                             | 46      | 79  | 86  | 56  | 49  | 20  | 55  | 13  | 75  | 7.0 | 100 | 4.7 | 38  |
| <u>JCD-6</u>                                             | 41      | 73  | 87  | 68  | 62  | 29  | 65  | 20  | 98  | 11  | 120 | 4.9 | 27  |
| <u>JCD-7</u>                                             | 50      | 83  | 83  | 43  | 41  | 16  | 65  | 17  | 100 | 8.3 | 120 | 4.5 | 42  |
| <u>JCD-8</u>                                             | 4.2     | 7.3 | 23  | 30  | 55  | 42  | 82  | 38  | 100 | 18  | 110 | 5.0 | 21  |
| <u>JCD-9</u>                                             | 6.2     | 6.2 | 16  | 11  | 29  | 15  | 51  | 20  | 79  | 9.3 | 85  | 4.1 | 23  |

**Deleted:** KU EXP 1-1, 0-16 cm**Deleted:** CH YED2, 0-4 cm**Deleted:** SP T3-3B**Deleted:** SP T2-7**Deleted:** KY T2-3**Deleted:** CH T2-1**Deleted:** CH YED3, 0-10 cm**Deleted:** CH Medv grass**Deleted:** CH Y4 grass**Deleted:** KU EXP 1-3, 212-216 cm**Deleted:** CH YED1, 300-305 cm**Deleted:** CH YED2, 300-305 cm**Deleted:** CH YED3, 520-525 cm**Deleted:** KY EXP1, 0-5 cm**Deleted:** KY EXP2, 110-115 cm**Deleted:** KY EXP3, 185-200 cm**Deleted:** CH DY-3A**Deleted:** CH DY-4A

**Table 3**

Long-chain *n*-alkanoic acids concentrations (in µg/gOC) of topsoil Holocene samples (modern vegetation/O-horizon) and Pleistocene ice complex samples.

|                                                          | C16    | C18  | C20  | C21  | C22   | C23  | C24   | C25  | C26   | C27   | C28   | C29  | C30   |                                 |
|----------------------------------------------------------|--------|------|------|------|-------|------|-------|------|-------|-------|-------|------|-------|---------------------------------|
|                                                          | µg/gOC |      |      |      |       |      |       |      |       |       |       |      |       |                                 |
| <b>Topsoil (modern vegetation and O-horizon samples)</b> |        |      |      |      |       |      |       |      |       |       |       |      |       |                                 |
| <del>TS-1</del>                                          | 511    | 220  | 176  | 80.5 | 539   | 311  | 1100  | 4.95 | 684   | 90.5  | 350   | 32.8 | 58.1  | Deleted: KU EXP 1-1, 0-16 cm    |
| <del>TS-2</del>                                          | 1740   | 664  | 673  | 235  | 1380  | 496  | 1390  | 543  | 1740  | 409   | 1580  | 113  | 305   | Deleted: CH YED2, 0-4 cm        |
| <del>TS-3</del>                                          | 664    | 296  | 480  | 116  | 1020  | 504  | 1710  | 415  | 1550  | 250   | 1060  | 132  | 456   | Deleted: SP T3-3B               |
| <del>TS-4</del>                                          | 1140   | 408  | 665  | 235  | 1400  | 431  | 1410  | 425  | 1250  | 242   | 651   | 143  | 455   | Deleted: SP T2-7                |
| <del>TS-5</del>                                          | 513    | 343  | 530  | 133  | 1140  | 359  | 1410  | 1.58 | 896   | 119   | 494   | 67.8 | 224   | Deleted: KY T2-3                |
| <del>TS-6</del>                                          | 1080   | 537  | 418  | 236  | 1420  | 790  | 2670  | 2.82 | 1570  | 127   | 657   | 46.6 | 174   | Deleted: CH T2-1                |
| <del>TS-7</del>                                          | 1420   | 352  | 538  | 281  | 1850  | 722  | 2010  | 651  | 1790  | 642   | 1580  | 730  | 1971  | Deleted: CH YED3, 0-10 cm       |
| <del>TS-8G</del>                                         | 3640   | 855  | 691  | 44.1 | 609   | 63.5 | 156   | 26.0 | 224   | 0.122 | 99.3  | 9.91 | 28.1  | Deleted: CH Medv grass          |
| <del>TS-9G</del>                                         | 4600   | 887  | 966  | 53.6 | 815   | 66.7 | 261   | 28.6 | 232   | 11.5  | 124   | 8.10 | 30.2  | Deleted: CH Y4 grass            |
| <b>Ice complex deposits</b>                              |        |      |      |      |       |      |       |      |       |       |       |      |       |                                 |
| <del>ICD-1</del>                                         | 1750   | 1600 | 4560 | 1460 | 9460  | 2300 | 8930  | 2020 | 5830  | 1030  | 3660  | 293  | 635   | Deleted: KU EXP 1-3, 212-216 cm |
| <del>ICD-2</del>                                         | 10400  | 4030 | 5800 | 2410 | 17100 | 7270 | 18600 | 6610 | 16600 | 5860  | 14800 | 6810 | 18700 | Deleted: CH YED1, 300-305 cm    |
| <del>ICD-3</del>                                         | 665    | 554  | 892  | 263  | 2070  | 1060 | 3070  | 646  | 2340  | 272   | 1310  | 133  | 532   | Deleted: CH YED2, 300-305 cm    |
| <del>ICD-4</del>                                         | 1400   | 769  | 1030 | 252  | 2040  | 910  | 3120  | 644  | 2440  | 266   | 1160  | 124  | 432   | Deleted: CH YED3, 520-525 cm    |
| <del>ICD-5</del>                                         | 426    | 304  | 447  | 126  | 1220  | 511  | 1970  | 70.4 | 1390  | 133   | 712   | 60.7 | 233   | Deleted: KY EXP1, 0-5 cm        |
| <del>ICD-6</del>                                         | 722    | 539  | 583  | 153  | 1370  | 606  | 2270  | 457  | 1970  | 181   | 1030  | 86.4 | 333   | Deleted: KY EXP2, 110-115 cm    |
| <del>ICD-7</del>                                         | 446    | 313  | 543  | 158  | 1330  | 562  | 2350  | 401  | 1370  | 154   | 743   | 63.1 | 230   | Deleted: KY EXP3, 185-200 cm    |
| <del>ICD-8</del>                                         | 920    | 402  | 895  | 108  | 1070  | 294  | 1180  | 184  | 799   | 70.3  | 331   | 34.4 | 100   | Deleted: CH DY-3A               |
| <del>ICD-9</del>                                         | 327    | 200  | 559  | 74   | 803   | 229  | 1010  | 2.17 | 718   | 64.9  | 334   | 28.7 | 104   | Deleted: CH DY-4A               |

**Table 4**

Sum of most abundant long-chain *n*-alkanoic acids and *n*-alkanes (concentrations in µg/gOC), and characteristic ratios of *n*-alkanoic acids and *n*-alkanes of topsoil Holocene (modern vegetation/O-horizon) and Pleistocene ice complex samples.

|                                                          | <i>n</i> -alkanoic acids                           |                                                       |                  | HMW acids/<br>HMW alkanes <sup>a</sup> | <i>n</i> -alkanes                                  |                                                      |                  | C <sub>23</sub> /<br>(C <sub>23</sub> +C <sub>23</sub> ) <sup>c</sup> | C <sub>25</sub> /<br>(C <sub>25</sub> +C <sub>29</sub> ) |
|----------------------------------------------------------|----------------------------------------------------|-------------------------------------------------------|------------------|----------------------------------------|----------------------------------------------------|------------------------------------------------------|------------------|-----------------------------------------------------------------------|----------------------------------------------------------|
|                                                          | ΣHMW <sup>a</sup><br>(>C <sub>22</sub> )<br>µg/gOC | ΣC <sub>22</sub> -C <sub>28</sub><br>(even)<br>µg/gOC | CPI <sup>b</sup> |                                        | ΣHMW <sup>a</sup><br>(>C <sub>21</sub> )<br>µg/gOC | ΣC <sub>25</sub> -C <sub>31</sub><br>(odd)<br>µg/gOC | CPI <sup>c</sup> |                                                                       |                                                          |
| <b>Topsoil (modern vegetation and O-horizon samples)</b> |                                                    |                                                       |                  |                                        |                                                    |                                                      |                  |                                                                       |                                                          |
| TS-1 <sub>v</sub>                                        | 3167                                               | 2670                                                  | 5.8              | 7.1                                    | 447                                                | 148                                                  | 2.7              | 0.78                                                                  | 0.60                                                     |
| TS-2 <sub>v</sub>                                        | 7958                                               | 6090                                                  | 3.8              | 13                                     | 612                                                | 494                                                  | 11               | 0.12                                                                  | 0.21                                                     |
| TS-3 <sub>v</sub>                                        | 7095                                               | 5340                                                  | 4.1              | 25                                     | 280                                                | 214                                                  | 7.2              | 0.07                                                                  | 0.15                                                     |
| TS-4 <sub>v</sub>                                        | 6397                                               | 4700                                                  | 3.7              | 15                                     | 418                                                | 323                                                  | 12               | 0.07                                                                  | 0.24                                                     |
| TS-5 <sub>v</sub>                                        | 4715                                               | 3940                                                  | 6.8              | 6.6                                    | 717                                                | 543                                                  | 9.1              | 0.12                                                                  | 0.17                                                     |
| TS-6 <sub>v</sub>                                        | 7454                                               | 6310                                                  | 6.0              | 25                                     | 300                                                | 211                                                  | 9.9              | 0.25                                                                  | 0.28                                                     |
| TS-7 <sub>v</sub>                                        | 11950                                              | 7230                                                  | 2.9              | 14                                     | 857                                                | 647                                                  | 7.8              | 0.08                                                                  | 0.09                                                     |
| TS-8 <sub>G</sub>                                        | 1216                                               | 1090                                                  | 9.5              | 5.6                                    | 217                                                | 148                                                  | 3.7              | 0.37                                                                  | 0.67                                                     |
| TS-9 <sub>G</sub>                                        | 1577                                               | 1430                                                  | 11               | 7.1                                    | 223                                                | 135                                                  | 2.5              | 0.36                                                                  | 0.59                                                     |
| Mean±stdev                                               | 5726±3431                                          | 4310±2190                                             | 5.9              | 13                                     | 452±230                                            | 318±195                                              | 7.3              | 0.25                                                                  | 0.33                                                     |
| Median and IQR                                           | 6397 <sup>7454</sup> <sub>3167</sub>               | 4700 <sup>6310</sup> <sub>6092</sub>                  | 2.7              | 7.6                                    | 418 <sup>621</sup> <sub>280</sub>                  | 214 <sup>494</sup> <sub>148</sub>                    | 3.6              | 0.23                                                                  | 0.22                                                     |
| <b>Ice complex deposits</b>                              |                                                    |                                                       |                  |                                        |                                                    |                                                      |                  |                                                                       |                                                          |
| ICD-1 <sub>v</sub>                                       | 34854                                              | 27883                                                 | 4.1              | 39                                     | 893                                                | 530                                                  | 4.9              | 0.43                                                                  | 0.38                                                     |
| ICD-2 <sub>v</sub>                                       | 112356                                             | 67078                                                 | 2.8              | 140                                    | 806                                                | 398                                                  | 3.0              | 0.44                                                                  | 0.35                                                     |
| ICD-3 <sub>v</sub>                                       | 11430                                              | 8791                                                  | 4.1              | 16                                     | 698                                                | 405                                                  | 4.6              | 0.40                                                                  | 0.33                                                     |
| ICD-4 <sub>v</sub>                                       | 11145                                              | 8768                                                  | 4.4              | 14                                     | 825                                                | 428                                                  | 3.8              | 0.42                                                                  | 0.29                                                     |
| ICD-5 <sub>v</sub>                                       | 6293                                               | 5285                                                  | 6.5              | 10                                     | 630                                                | 280                                                  | 2.9              | 0.54                                                                  | 0.40                                                     |
| ICD-6 <sub>v</sub>                                       | 8293                                               | 6629                                                  | 4.9              | 12                                     | 708                                                | 347                                                  | 2.7              | 0.47                                                                  | 0.39                                                     |
| ICD-7 <sub>v</sub>                                       | 7196                                               | 5787                                                  | 4.7              | 11                                     | 671                                                | 323                                                  | 3.5              | 0.45                                                                  | 0.29                                                     |
| ICD-8 <sub>v</sub>                                       | 4063                                               | 3380                                                  | 5.5              | 7.6                                    | 533                                                | 344                                                  | 2.7              | 0.19                                                                  | 0.35                                                     |
| ICD-9 <sub>v</sub>                                       | 3295                                               | 2867                                                  | 8.3              | 9.3                                    | 355                                                | 244                                                  | 4.3              | 0.17                                                                  | 0.27                                                     |
| Mean±stdev                                               | 22103±35150                                        | 15160±20800                                           | 5.0              | 29                                     | 680±163                                            | 367±85                                               | 3.6              | 0.39                                                                  | 0.34                                                     |
| Median and IQR                                           | 8290 <sup>11430</sup> <sub>6290</sub>              | 6630 <sup>8790</sup> <sub>5285</sub>                  | 1.6              | 43                                     | 698 <sup>806</sup> <sub>630</sub>                  | 347 <sup>405</sup> <sub>323</sub>                    | 0.8              | 0.13                                                                  | 0.05                                                     |

a HMW; high-molecular weight

b CPI; carbon preference index for chain lengths C<sub>22</sub>-C<sub>28</sub>, for calculation see caption of Fig. 2.

c CPI; carbon preference index for chain lengths C<sub>23</sub>-C<sub>31</sub>, for calculation see caption of Fig. 2.

|                                      |
|--------------------------------------|
| Deleted: KU EXP 1-1, 0-16 cm         |
| Deleted: CH YED2, 0-4 cm             |
| Deleted: SP T3-3B                    |
| Formatted Table                      |
| Deleted: SP T2-7                     |
| Deleted: KY T2-3                     |
| Deleted: CH T2-1                     |
| Deleted: CH YED3, 0-10 cm            |
| Deleted: CH Medv grass               |
| Deleted: CH Y4 grass                 |
| Deleted: (6397)                      |
| Deleted: (4700)                      |
| Deleted: (418)                       |
| Deleted: (214)                       |
| Formatted Table                      |
| Deleted: (median)                    |
| Deleted: St.dev ...edian and (...QR) |
| Deleted: 3431 (4290)                 |
| Deleted: 2190 (4320)                 |
| Deleted: 230                         |
| Deleted: 195 (345)                   |
| Deleted: KU EXP 1-3, 212-216 cm      |
| Deleted: CH YED1, 300-305 cm         |
| Deleted: CH YED2, 300-305 cm         |
| Deleted: CH YED3, 520-525 cm         |
| Deleted: KY EXP1, 0-5 cm             |
| Deleted: KY EXP2, 110-115 cm         |
| Deleted: KY EXP3, 185-200 cm         |
| Deleted: CH DY-3A                    |
| Deleted: CH DY-4A                    |
| Deleted: (8290)                      |
| Deleted: (6630)                      |
| Deleted: (698)                       |
| Deleted: (347)                       |
| Formatted Table                      |
| Deleted: 35150(5140)                 |
| Deleted: 20880 (3510)                |
| Deleted: 163 (176)                   |
| Deleted: 85 (81)                     |
| Deleted: St.dev                      |



**Table 5**

$\delta^2\text{H}$  signatures (in ‰) of *n*-alkanoic acids and *n*-alkanes of topsoil Holocene (modern vegetation/O-horizon) and Pleistocene ice complex samples.

|                                                          | <i>n</i> -alkanoic acids |      |      |      |      |      |      | <i>n</i> -alkanes |      |      |      |
|----------------------------------------------------------|--------------------------|------|------|------|------|------|------|-------------------|------|------|------|
|                                                          | C16                      | C18  | C20  | C22  | C24  | C26  | C28  | C25               | C27  | C29  | C31  |
| <b>Topsoil (modern vegetation and O-horizon samples)</b> |                          |      |      |      |      |      |      |                   |      |      |      |
| <del>TS-1</del>                                          | -162                     | -180 |      | -119 | -178 | -203 | -197 | -168              | -240 | -236 | -244 |
| <del>TS-2</del>                                          | -188                     | -192 |      | -211 | -222 | -232 | -225 | -196              | -237 | -251 | -239 |
| <del>TS-3</del>                                          |                          |      |      | -126 | -203 | -218 | -225 |                   | -125 | -234 | -259 |
| <del>TS-4</del>                                          | -171                     | -213 |      | -180 | -196 | -210 | -206 |                   | -182 | -245 | -243 |
| <del>TS-5</del>                                          |                          | -235 | -185 | -253 | -257 | -264 | -244 | -164              | -240 | -266 | -273 |
| <del>TS-6</del>                                          | -189                     | -222 |      | -214 | -235 | -236 | -224 | -203              | -221 | -258 | -282 |
| <del>TS-7</del>                                          | -184                     |      | -190 | -218 | -227 | -225 | -220 | -199              | -234 | -259 | -250 |
| <del>TS-8G</del>                                         | -258                     | -246 | -253 | -256 | -285 | -286 |      | -253              | -236 | -234 | -224 |
| <del>TS-9G</del>                                         | -237                     | -244 | -251 | -248 | -245 | -248 |      | -227              | -223 | -234 | -209 |
| Mean                                                     | -199                     | -219 | -220 | -203 | -228 | -236 | -220 | -201              | -215 | -246 | -247 |
| St.dev                                                   | 35                       | 25   | 37   | 52   | 33   | 27   | 15   | 32                | 39   | 13   | 23   |
| <b>Ice complex deposits</b>                              |                          |      |      |      |      |      |      |                   |      |      |      |
| <del>ICD-1</del>                                         | -194                     | -227 | -243 | -252 | -245 | -241 | -232 | -237              | -257 | -268 | -265 |
| <del>ICD-2</del>                                         |                          |      | -231 | -264 | -271 | -280 | -271 | -217              | -266 | -283 | -297 |
| <del>ICD-3</del>                                         |                          |      |      | -249 | -262 | -278 | -264 | -254              | -279 | -283 | -307 |
| <del>ICD-4</del>                                         |                          |      | -209 | -252 | -266 | -277 | -254 | -243              | -261 | -285 | -305 |
| <del>ICD-5</del>                                         |                          |      | -169 | -260 | -275 | -288 | -273 | -189              | -245 | -269 | -283 |
| <del>ICD-6</del>                                         | -211                     | -216 | -252 | -266 | -274 | -294 | -285 | -192              | -254 | -281 | -296 |
| <del>ICD-7</del>                                         |                          |      | -191 | -263 | -277 | -287 | -273 | -210              | -279 | -295 | -309 |
| <del>ICD-8</del>                                         | -244                     | -256 | -277 | -277 | -277 | -293 | -280 | -195              | -221 | -263 | -298 |
| <del>ICD-9</del>                                         | -228                     | -229 | -261 | -265 | -262 | -262 | -267 | -251              | -270 | -295 | -313 |
| Mean                                                     | -219                     | -232 | -229 | -261 | -268 | -278 | -267 | -221              | -259 | -280 | -297 |
| St.dev                                                   | 21                       | 17   | 37   | 8.6  | 10   | 17   | 16   | 26                | 18   | 12   | 15   |

**Deleted:** KU EXP 1-1, 0-16 cm  
**Deleted:** CH YED2, 0-4 cm  
**Deleted:** SP T3-3B  
**Deleted:** SP T2-7  
**Deleted:** KY T2-3  
**Deleted:** CH T2-1  
**Deleted:** CH YED3, 0-10 cm  
**Deleted:** CH Medv grass  
**Deleted:** CH Y4 grass

**Deleted:** KU EXP 1-3, 212-216 cm  
**Deleted:** CH YED1, 300-305 cm  
**Deleted:** CH YED2, 300-305 cm  
**Deleted:** CH YED3, 520-525 cm  
**Deleted:** KY EXP1, 0-5 cm  
**Deleted:** KY EXP2, 110-115 cm  
**Deleted:** KY EXP3, 185-200 cm  
**Deleted:** CH DY-3A  
**Deleted:** CH DY-4A

**Table 6**

Location, sampling depth and isotopic values of samples along a surface sediment transect in the Laptev Sea (data from Bröder et al., 2016b), with percentage topsoil (TS) and ice complex deposit (ICD) OC contributions to the samples based on source-apportionment calculations with  $\delta^2\text{H}$  leaf wax end-members versus  $\delta^{13}\text{C}-\Delta^{14}\text{C}$  end-members (end-member values are described in the text).

| ID <sup>a</sup> | Lat<br>N | Long<br>°E | Depth<br>m | Sample values        |                      |                      |                                         |                            |                            | Source contributions           |                                 |                                                                    |                                                                     |
|-----------------|----------|------------|------------|----------------------|----------------------|----------------------|-----------------------------------------|----------------------------|----------------------------|--------------------------------|---------------------------------|--------------------------------------------------------------------|---------------------------------------------------------------------|
|                 |          |            |            | C <sub>27</sub><br>‰ | C <sub>29</sub><br>‰ | C <sub>31</sub><br>‰ | C <sub>27-29-31</sub> <sup>b</sup><br>‰ | $\delta^{13}\text{C}$<br>‰ | $\Delta^{14}\text{C}$<br>‰ | TS<br>using $\delta^2\text{H}$ | ICD<br>using $\delta^2\text{H}$ | TS <sup>c</sup><br>using $\delta^{13}\text{C}-\Delta^{14}\text{C}$ | ICD <sup>c</sup><br>using $\delta^{13}\text{C}-\Delta^{14}\text{C}$ |
| TB-46           | 72.700   | 130.180    | 6          | -236.2               | -237.4               | -230.4               | -235.0                                  | -26.5                      | -436                       | 89%                            | 11%                             | 63% (63%)                                                          | 37% (37%)                                                           |
| YS-9            | 73.366   | 129.997    | 23         | -233.7               | -231.0               | -227.8               | -231.1                                  | -26.1                      | -415                       | 91%                            | 8.9%                            | 63% (65%)                                                          | 37% (35%)                                                           |
| YS-6            | 74.724   | 130.016    | 32         | -234.2               | -241.0               | -235.4               | -236.8                                  | -25.6                      | -465                       | 86%                            | 14%                             | 51% (59%)                                                          | 49% (41%)                                                           |
| SW-24           | 75.599   | 129.558    | 46         | -229.3               | -236.5               | -243.5               | -236.4                                  | -24.8                      | -284                       | 87%                            | 13%                             | 70% (72%)                                                          | 30% (28%)                                                           |
| SW-23           | 76.171   | 129.333    | 56         | -219.9               | -243.3               | -243.3               | -236.0                                  | -25.0                      | -333                       | 83%                            | 17%                             | 65% (70%)                                                          | 35% (30%)                                                           |
| SW-06           | 77.142   | 127.378    | 92         | -219.5               | -237.0               | -241.4               | -233.2                                  | -23.2                      | -364                       | 87%                            | 13%                             | 39% (53%)                                                          | 61% (47%)                                                           |
| SW-03           | 78.238   | 126.150    | 2601       | -221.1               | -238.0               | -247.7               | -235.9                                  | -22.6                      | -426                       | 85%                            | 15%                             | 23% (42%)                                                          | 77% (58%)                                                           |
| SW-01           | 78.942   | 125.243    | 3146       | -223.8               | -241.8               | -246.0               | -238.0                                  | -22.3                      | -418                       | 83%                            | 17%                             | 21% (42%)                                                          | 79% (58%)                                                           |

a Location, depth and bulk carbon isotope data from Bröder et al. (2016b)

b weighted average based on individual concentrations

c numbers in brackets are source contributions using the  $\delta^{13}\text{C}-\Delta^{14}\text{C}$  approach but with additional corrections for cross-shelf lateral transport time of topsoil OC (similar as in Bröder et al., 2016a); we applied linear aging along the transect based on the distance from the coast, with a maximum aging of 5000 years for station SW-01.

|                                     |               |                           |
|-------------------------------------|---------------|---------------------------|
| <b>Page 32: [1] Formatted Table</b> | <b>Jorien</b> | <b>5/25/17 9:04:00 AM</b> |
| Formatted Table                     |               |                           |
| <b>Page 32: [2] Formatted Table</b> | <b>Jorien</b> | <b>5/25/17 9:05:00 AM</b> |
| Formatted Table                     |               |                           |
| <b>Page 32: [3] Formatted Table</b> | <b>Jorien</b> | <b>6/3/17 3:00:00 PM</b>  |
| Formatted Table                     |               |                           |
| <b>Page 32: [4] Deleted</b>         | <b>Jorien</b> | <b>6/3/17 2:59:00 PM</b>  |
| <i>St.dev</i>                       |               |                           |
| <b>Page 32: [4] Deleted</b>         | <b>Jorien</b> | <b>6/3/17 2:59:00 PM</b>  |
| <i>St.dev</i>                       |               |                           |
| <b>Page 32: [4] Deleted</b>         | <b>Jorien</b> | <b>6/3/17 2:59:00 PM</b>  |
| <i>St.dev</i>                       |               |                           |
| <b>Page 32: [5] Formatted Table</b> | <b>Jorien</b> | <b>6/3/17 3:11:00 PM</b>  |
| Formatted Table                     |               |                           |
